# Supplementary material for: Injury of the mammillothalamic tract in patients with subarachnoid haemorrhage: a retrospective diffusion tensor imaging study
Source: PubMed Central journal article supplement — BMJ Open. 2014 Jul 21;4(7):e005613. doi: 10.1136/bmjopen-2014-005613 (PMC4120333; doi:10.1136/bmjopen-2014-005613), 2014-07-21
Supplement: bmjopen-2014-005613.draft_revisions.pdf [file bmjopen-2014-005613.draft_revisions.pdf]

# BMJ Open

## Injury of the mammillothalamic tract in patients with subarachnoid hemorrhage: a diffusion tensor imaging study

|                                 |                                                                                                                                                                                                                                                                                                                                                                                                                                                                                                              |
|---------------------------------|--------------------------------------------------------------------------------------------------------------------------------------------------------------------------------------------------------------------------------------------------------------------------------------------------------------------------------------------------------------------------------------------------------------------------------------------------------------------------------------------------------------|
| Journal:                        | <i>BMJ Open</i>                                                                                                                                                                                                                                                                                                                                                                                                                                                                                              |
| Manuscript ID:                  | bmjopen-2014-005613                                                                                                                                                                                                                                                                                                                                                                                                                                                                                          |
| Article Type:                   | Research                                                                                                                                                                                                                                                                                                                                                                                                                                                                                                     |
| Date Submitted by the Author:   | 03-May-2014                                                                                                                                                                                                                                                                                                                                                                                                                                                                                                  |
| Complete List of Authors:       | Jang, Sung Ho; College of Medicine, Yeungnam University, Physical Medicine and Rehabilitation<br>Choi, Byung Yeon; College of Medicine, Yeungnam University, Neurosurgery<br>Kim, Seong Ho; College of Medicine, Yeungnam University, Neurosurgery<br>Chang, Chul Hoon; College of Medicine, Yeungnam University, Neurosurgery<br>Jung, Young Jin; College of Medicine, Yeungnam University, Neurosurgery<br>Kwon, Hyeok Gyu; College of Medicine, Yeungnam University, Physical Medicine and Rehabilitation |
| <b>Primary Subject Heading</b>: | Rehabilitation medicine                                                                                                                                                                                                                                                                                                                                                                                                                                                                                      |
| Secondary Subject Heading:      | Neurology                                                                                                                                                                                                                                                                                                                                                                                                                                                                                                    |
| Keywords:                       | REHABILITATION MEDICINE, Magnetic resonance imaging < RADIOLOGY & IMAGING, Neurological injury < NEUROLOGY                                                                                                                                                                                                                                                                                                                                                                                                   |
|                                 |                                                                                                                                                                                                                                                                                                                                                                                                                                                                                                              |

SCHOLARONE™  
Manuscripts

only

1  
2  
3  
4 **Title: Injury of the mammillothalamic tract in patients with subarachnoid hemorrhage:**  
5 **a diffusion tensor imaging study.**  
6  
7

8 **Running title: Injury of the mammillothalamic tract**  
9  
10

11  
12  
13  
14  
15 Author 1: Sung Ho Jang, MD

16 Department of Physical Medicine and Rehabilitation, College of Medicine, Yeungnam  
17 University  
18

19 e-mail: [strokerehab@hanmail.net](mailto:strokerehab@hanmail.net)  
20  
21

22  
23 Author 2 : Byung Yeon Choi, MD

24 Department of Neurosurgery, College of Medicine, Yeungnam University  
25

26 e-mail: [bychoi@med.yu.ac.kr](mailto:bychoi@med.yu.ac.kr)  
27  
28

29  
30 Author 3 : Seong Ho Kim, MD

31 Department of Neurosurgery, College of Medicine, Yeungnam University  
32

33 e-mail: [shkim@medical.yeungnam.ac.kr](mailto:shkim@medical.yeungnam.ac.kr)  
34  
35

36  
37 Author 4 : Chul Hoon Chang, MD

38 Department of Neurosurgery, College of Medicine, Yeungnam University  
39

40 e-mail: [cch0102@yumail.ac.kr](mailto:cch0102@yumail.ac.kr)  
41  
42

43  
44 Author 5: Young Jin Jung, MD

45 Department of Neurosurgery, College of Medicine, Yeungnam University  
46

47 e-mail: [sofesofe@hanmail.net](mailto:sofesofe@hanmail.net)  
48  
49  
50  
51  
52  
53  
54  
55  
56  
57  
58  
59  
60

1  
2  
3  
4 Author 6 (Corresponding author): Hyeok Gyu Kwon, MS

5  
6 Department of Physical Medicine and Rehabilitation, College of Medicine, Yeungnam  
7 University

8  
9 Mailing Address: Department of Physical Medicine and Rehabilitation, College of Medicine,  
10 Yeungnam University 317-1, Daemyung dong, Namku, Daegu, 705-717, Republic of Korea

11  
12 Tel: 82-53-620-4098      FAX: 82-53-625-3508      e-mail: khg0715@hanmail.net  
13  
14  
15  
16  
17  
18  
19  
20  
21  
22  
23  
24  
25  
26  
27  
28  
29  
30  
31  
32  
33  
34  
35  
36  
37  
38  
39  
40  
41  
42  
43  
44  
45  
46  
47  
48  
49  
50  
51  
52  
53  
54  
55  
56  
57  
58  
59  
60

**Abstract**

**Objective:** Few studies have reported on injury of the mammillothalamic tract (MTT) in stroke patients. However, no study in patients with subarachnoid hemorrhage (SAH) has been reported. Using diffusion tensor tractography (DTT), we attempted to investigate injury of the MTT in patients with subarachnoid hemorrhage.

**Methods:** We recruited 16 patients with SAH and 15 control subjects. Diffusion tensor imaging (DTI) was obtained at  $5.7 \pm 1.5$  weeks after onset and reconstruction of the MTT was performed using the probabilistic tractography method. The fractional anisotropy (FA) value and tract number of the MTT and the Mini-Mental State Examination (MMSE) score were determined. Values of FA and tract volume showing decrement of more than two standard deviations that of normal control were defined as abnormal.

**Results:** The FA value and tract volume in the patient group were significantly lower than those of the control group ( $p < .05$ ). In addition, MMSE showed strong ( $r = 0.67$ ,  $p = 0.005$ ) positive correlation with tract volume without correlation with FA. In the individual analysis, 16 MTTs of 32 MTTs in 16 patients showed abnormalities of the MTT in terms of the FA value, the tract volume, or the presence of a reconstructed MTT. As a result, ten (62.5%) of 16 patients showed abnormality of the MTT in at least one hemisphere.

**Conclusion:** We found that patients with SAH showed injury of the MTT and this injury showed correlation with cognitive dysfunction. Our results suggest that evaluation of the MTT using DTI would be necessary for patients with cognitive dysfunction following SAH.

**Keywords:** Mammillothalamic tract, Subarachnoid hemorrhage, Diffusion tensor tractography

### Strengths and limitations of this study

- This is the first study on the injury of the mammillothalamic tract (MTT) in patients with subarachnoid hemorrhage (SAH) using diffusion tensor imaging (DTI).
- The main strength of our study is to find the relation between MTT injury and cognitive function with SAH
- Limitation of our study is that fiber tracking of the MTT might be affected by artifact, such as an aneurysmal clip. Therefore, conduct of further studies to overcome this limitation would be necessary.

## Introduction

The mammillothalamic tract (MTT) connects the mammillary body and the anterior thalamus as a part of the Papez circuit.<sup>1</sup> Because of the anatomical characteristics of the MTT, thin, short, and located deep within the brain, accurate estimation of the MTT has been difficult in the live human brain. However, diffusion tensor tractography (DTT), which is derived from diffusion tensor imaging (DTI), allows for reconstruction of the MTT in the human brain.<sup>2</sup> Therefore, accurate estimation of the MTT in terms of DTI parameters and three-dimensional configuration is now possible.<sup>2</sup> A few studies have reported on injury of the MTT in thalamic hemorrhage and thalamic infarct, however, so far, little is known about injury of the MTT.<sup>3 4</sup>

Subarachnoid hemorrhage (SAH) is extravasation of blood into the subarachnoid space accompanied by various neurological sequelae in terms of memory, executive function, language, motor function, and cranial nerve function.<sup>5-16</sup> In particular, memory deficit is known to be one of the most common sequelae of SAH.<sup>7 8 10 11 14</sup> In the past, previous studies have suggested that the neurotoxic effects of blood, vasospasm, or increased intracranial pressure are pathogenic mechanisms of neural sequelae following SAH.<sup>5 7 17-23</sup> After introduction of DTI, among the neural tracts associated with memory, injuries in the fornix and cingulum were reported in patients with SAH.<sup>24</sup> However, no study on neural injury of the MTT in patients with SAH has been reported.

In the current study, using DTT, we attempted to investigate injury of the MTT in patients with SAH.

## Methods

### Subjects

We recruited 16 patients with SAH (male: 9, female: 7, mean age: 51.6±13.3 years, range: 34~70 years) and 15 normal healthy control subjects (male: 7, female: 8, mean age: 48.1±15.1 years, range: 20~67 years) with no previous history of neurological, physical, or psychiatric illness for this study. Inclusion criteria for patients were as follows: (1) first ever stroke, (2) age 30~70 years, (3) hemorrhage in the subarachnoid space due to aneurismal rupture confirmed by a neuroradiologist, (4) DTI was scanned at a chronic stage (between 4 ~ 8 weeks) after onset, and (5) no hydrocephalus, intracerebral hemorrhage, or intraventricular hemorrhage. Severity of SAH was assessed according to Fisher CT grade.<sup>25</sup> Patients who showed any lesion along or around the MTT pathway between the mammillary body and thalamus were excluded. This study was conducted retrospectively and the study protocol was approved by the Institutional Review Board of a university hospital.

---

### Figure 1

---

### Clinical evaluation

Cognitive function was evaluated at the time of DTI scanning. The mini-mental state examination (MMSE) was used for assessment of cognitive impairment. The reliability and validity of the MMSE have been well established.<sup>26</sup>

### Diffusion tensor tractography

A 6-channel head coil on a 1.5 T Philips Gyroscan Intera (Philips, Ltd, Best, The Netherlands) with single-shot echo-planar imaging was used for acquisition of DTI data. For each of the 32 non-collinear diffusion sensitizing gradients, we acquired 67 contiguous slices

1  
2  
3  
4 parallel to the anterior commissure-posterior commissure line. Imaging parameters were as  
5  
6 follows: acquisition matrix =  $96 \times 96$ ; reconstructed to matrix =  $128 \times 128$ ; field of view =  
7  
8  $221 \times 221 \text{ mm}^2$ ; TR = 10,726 ms; TE = 76 ms; parallel imaging reduction factor (SENSE  
9  
10 factor) = 2; EPI factor = 49;  $b = 1000 \text{ s/mm}^2$ ; NEX = 1; and a slice thickness of 2.3 mm  
11  
12 (acquired voxel size  $1.73 \times 1.73 \times 2.3 \text{ mm}^3$ ). Affine multi-scale two-dimensional registration  
13  
14 using the Oxford Centre for Functional Magnetic Resonance Imaging of Brain (FMRIB)  
15  
16 Software Library (FSL; [www.fmrib.ox.ac.uk/fsl](http://www.fmrib.ox.ac.uk/fsl)) was used for removal of eddy current-  
17  
18 induced image distortions.<sup>27</sup> Fiber tracking was performed using a probabilistic tractography  
19  
20 method based on a multi-fiber model, and applied in the current study utilizing tractography  
21  
22 routines implemented in FMRIB Diffusion (5000 streamline samples, 0.5 mm step lengths,  
23  
24 curvature thresholds = 0.2).<sup>27-29</sup> MTTs were determined by selection of fibers passing through  
25  
26 three regions of interest (ROIs). Seed ROIs were placed on the mammillary body on the axial  
27  
28 image.<sup>2</sup> Two target ROIs were drawn at the portion of the MTT area (between the portion of  
29  
30 the fornix and the red nucleus in the anteroposterior direction) at about the bicommissural  
31  
32 level and the portion of the anterior thalamus on the axial image.<sup>2</sup> Of 5000 samples generated  
33  
34 from each seed voxel, results for each contact were the visualized threshold point at 5  
35  
36 streamline through each voxel for analysis. Values of fractional anisotropy (FA) and tract  
37  
38 volume of MTT were measured. Values of FA and tract volume showing decrement of more  
39  
40 than two standard deviations that of normal control were defined as abnormal.  
41  
42  
43  
44  
45  
46

### 47 **Statistical analysis**

48  
49  
50 We used SPSS software (v.15.0; SPSS, Chicago, IL) for data analysis. Data on MTTs  
51  
52 that were not reconstructed were excluded in statistical analysis. An independent t-test was  
53  
54 used for determination of variances in the value of FA and tract volume between the patient  
55  
56 and control group. Subsequently, using Pearson correlation, DTT parameters for FA and tract  
57  
58  
59  
60



1  
2  
3  
4 volume of the patient group were used in determination of correlation with MMSE.<sup>30</sup> The  
5  
6 significant level of the *p* value was set at 0.05.  
7  
8  
9  
10  
11  
12  
13  
14  
15  
16  
17  
18  
19  
20  
21  
22  
23  
24  
25  
26  
27  
28  
29  
30  
31  
32  
33  
34  
35  
36  
37  
38  
39  
40  
41  
42  
43  
44  
45  
46  
47  
48  
49  
50  
51  
52  
53  
54  
55  
56  
57  
58  
59  
60

## Results

A summary of the demographic data for the patient and control groups is shown in Table 1. The artery distribution of aneurismal rupture for SAH in 16 patients was as follows: the anterior communicating artery: 11 patients (68.8%), the middle cerebral artery: three patients (18.8%), the posterior communicating artery: one patient (6.2%), and the anterior cerebral artery: one patient (6.2%). In addition, 12 patients (75%) patients underwent aneurysmal clipping and two patients underwent endovascular coiling (12.5%). The two remaining patients (12.5%) received conservative treatment. Average MMSE was  $19.8 \pm 8.8$  and Fisher CT grade was  $3.4 \pm 0.5$ . DTI scanning was performed at  $5.7 \pm 1.5$  weeks (range: 4~8 weeks) after SAH onset.

---

Table 1

---

A summary of the results of DTT parameters for MTT in the patient and control groups is shown in Table 2. Values for FA and tract volume were significantly lower in the patient group than in the control group, respectively ( $p < .05$ ). The tract volume of the MTT showed strong ( $r = 0.67$ ,  $p = 0.005$ ) positive correlation with MMSE, however, no correlation was observed between the FA value of MTT and MMSE ( $r = 0.41$ ,  $p = 0.11$ ).<sup>30</sup>

---

Table 2

---

Figure 2 shows the results for incidence of injury of the MTT with DTT parameters. Among 32 hemispheres of 16 patients, the MTT was not reconstructed in five hemispheres of four patients (right hemisphere: two, left hemisphere: one, both hemispheres: one); in contrast,

1  
2  
3  
4 the MTTs were reconstructed in all 30 hemispheres of 15 control subjects. With regard to the  
5  
6 FA and tract volume, nine MTTs in six patients (right hemisphere: one, left hemisphere: two,  
7  
8 both hemispheres: three) and 13 MTTs in nine patients (right hemisphere: four, left  
9  
10 hemisphere: one, both hemispheres: four) of 32 hemispheres in 16 patients revealed a  
11  
12 decrement of more than two standard deviations, compared with control subjects. Six MTTs  
13  
14 in five patients (right hemisphere: three, left hemisphere: one, both hemispheres: one) showed  
15  
16 a decrement of more than two standard deviations in both FA and tract volume. As a result,  
17  
18 16 MTTs (right hemisphere: two, left hemisphere: two, both hemispheres: six) of 32 MTTs in  
19  
20 16 patients showed abnormalities of the MTT. Three patients in one hemisphere and one  
21  
22 patient in both hemispheres whose MTT was not reconstructed belonged to these 16 patients.  
23  
24 Consequently, in the individual analysis, the prevalence of MTT abnormality was 62.5% (10  
25  
26 of 16 patients).  
27  
28  
29  
30

---

31  
32 Fig 2  
33  
34  
35  
36  
37  
38  
39  
40  
41  
42  
43  
44  
45  
46  
47  
48  
49  
50  
51  
52  
53  
54  
55  
56  
57  
58  
59  
60

---

## Discussion

In the current study, we investigated injury of the MTT in patients with SAH using DTT. We obtained the following results: 1) the FA value and tract volume in the patient group were significantly lower than those of the control group, 2) MMSE showed strong ( $r=0.67$ ,  $p=0.005$ ) positive correlation with tract volume without correlation with FA value, 3) in the individual analysis, 16 MTTs of 32 MTTs in 16 patients showed abnormalities of the MTT in terms of the FA value, tract volume, or the presence of a reconstructed MTT. As a result, ten (62.5%) of 16 patients showed abnormality of the MTT in at least one hemisphere.

The FA value indicates the degree of directionality of water diffusion and has a range of zero (completely isotropic diffusion) to one (completely anisotropic diffusion). It represents the white matter organization: in detail, the degree of directionality and integrity of white matter microstructures such as axons, myelin, and microtubules.<sup>31</sup> In contrast, tract volume, the number of voxels in a neural tract, reflects the neural fibers contained within a neural tract.<sup>32</sup> Therefore, a decrease in the FA or tract volume indicates an injury of the neural tract. Consequently, our results showing that the FA value and tract volume in the patient group were significantly lower than those of the control group indicate injury of the MTT in the patient group.

Regarding the relation between MTT injury and cognition, MMSE showed strong positive correlation with the tract volume of the MTT without correlation with FA.<sup>30</sup> These results appear to indicate that the tract volume is more sensitive than the FA value for detection of injury of the MTT. The MMSE is the most widely used tool for screening cognitive dysfunction.<sup>33</sup> Because this study was conducted retrospectively, we could not employ detailed neuropsychological testing for evaluation of the function of the MTT.

1  
2  
3  
4 Therefore, conduct of further prospective studies, including specific neurophysiological tests  
5  
6 for MTT function should be encouraged.  
7  
8

9  
10 The pathogenic mechanism of neural injury following SAH has not been elucidated  
11 and few DTI studies have reported on this mechanism.<sup>15 34</sup> In 2007, Liu et al. demonstrated  
12 that SAH caused global mild vasogenic edema in white matter and deep gray matter by  
13 measuring the apparent diffusion coefficient value in the subacute stage of SAH, which was  
14 undetectable on T2-weighted and diffusion-weighted MR images.<sup>34</sup> In a recent study, Yeo et  
15 al. [2012] reported injury of the CST at the midbrain in patients with SAH.<sup>15</sup> This study  
16 suggested that frequent occurrence of SAH into perimesencephalic cisterns could be ascribed  
17 to injury of the CST, through mechanical (increased intracranial pressure or direct mass) or  
18 chemical mechanisms (a blood clot itself can cause extensive damage).<sup>5 23 35</sup> Considering that  
19 the MTT is located in close proximity to a cistern, the MTT in patients with SAH appears to  
20 be injured by mechanisms similar to those of CST injury at the midbrain.<sup>5 15 17 18 23</sup>  
21  
22  
23  
24  
25  
26  
27  
28  
29  
30  
31  
32  
33

34  
35 In conclusion, we found injury of the MTT in the patient group, compared with the  
36 control group. In addition, in the individual analysis, 16 MTTs (50%) of 32 hemispheres  
37 showed injury of the MTT and ten (62.5%) of 16 patients showed injury of the MTT in at  
38 least in one hemisphere in terms of DTT parameters or the presence of a reconstructed MTT.  
39 Our results suggest that evaluation of the MTT using DTI would be necessary for patients  
40 with cognitive dysfunction following SAH. As for injury of the MTT, to the best of our  
41 knowledge, one study was reported in patients with thalamic hemorrhage.<sup>3</sup> Therefore, this is  
42 the first DTT study on injury of the MTT in patients with SAH. However, several limitations  
43 of DTI should be considered.<sup>36 37</sup> First, DTI is a powerful anatomic imaging tool that can  
44 demonstrate gross fiber architecture; however, reflection of all fibers, particularly small fibers,  
45 can be difficult. Second, fiber tracking of the MTT might be affected by artifact, such as an  
46  
47  
48  
49  
50  
51  
52  
53  
54  
55  
56  
57  
58  
59  
60

1  
2  
3  
4 aneurysmal clip. Therefore, conduct of further studies to overcome these limitations would be  
5  
6 necessary.  
7  
8  
9  
10

### 11 12 **Acknowledgement**

13  
14 This research was supported by Basic Science Research Program through the National  
15 Research Foundation of Korea(NRF) funded by the Ministry of Education, Science and  
16 Technology(2012R1A1A4A01001873).  
17  
18  
19  
20  
21

### 22 **Contributors**

23  
24 Sung Ho Jang: Conceiving and designing the study, funding, data acquisition, manuscript  
25 development and manuscript writing. Byung Yeon Choi: Acquisition and analysis of data,  
26 Seong Ho Kim: Research design and data acquisition. Chul Hoon Chang: Research design  
27 and data acquisition. Young Jin Jung: Research design and technical support. Hyeok Gyu  
28 Kwon: Manuscript development, data acquisition, manuscript writing and manuscript  
29 authorization.  
30  
31  
32  
33  
34  
35  
36  
37

### 38 **Funding**

39  
40 This research was supported by Basic Science Research Program through the National  
41 Research Foundation of Korea(NRF) funded by the Ministry of Education, Science and  
42 Technology(2012R1A1A4A01001873).  
43  
44  
45  
46  
47

### 48 **Competing interests**

49  
50 None  
51  
52

### 53 **Ethics approval**

54  
55 This study protocol was approved by the Institutional Review Board of the Yeungnam  
56 university hospital.  
57  
58  
59  
60

## References

1. Aggleton JP, Brown MW. Episodic memory, amnesia, and the hippocampal-anterior thalamic axis. *Behav Brain Sci* 1999;22:425-44; discussion 44-89.
2. Kwon HG, Hong JH, Jang SH. Mammillothalamic tract in human brain: diffusion tensor tractography study. *Neurosci Lett* 2010;481:51-3.
3. Jang SH, Lee HD, Kwon HG. Injury of the mammillothalamic tract in patients with thalamic hemorrhage. *Front Hum Neurosci* 2014;[Epub ahead of print].
4. Jang SH, Jun L, Kwon HG. Injuries of neural tracts in the Papez circuit following anterior thalamic infarction. *Neurology* 2014;[Epub ahead of print].
5. van Gijn J, van Dongen KJ, Vermeulen M, *et al.* Perimesencephalic hemorrhage: a nonaneurysmal and benign form of subarachnoid hemorrhage. *Neurology* 1985;35:493-7.
6. Ferrante L, Acqui M, Mastronardi L, *et al.* Posterior inferior cerebellar artery (PICA) aneurysm presenting with SAH and contralateral crural monoparesis: a case report. *Surg Neurol* 1992;38:43-5.
7. Ogden JA, Mee EW, Henning M. A prospective study of impairment of cognition and memory and recovery after subarachnoid hemorrhage. *Neurosurgery* 1993;33:572-86; discussion 86-7.
8. Ostbye T, Levy AR, Mayo NE. Hospitalization and case-fatality rates for subarachnoid hemorrhage in Canada from 1982 through 1991. The Canadian Collaborative Study Group of Stroke Hospitalizations. *Stroke* 1997;28:793-8.
9. Powell J, Kitchen N, Heslin J, *et al.* Psychosocial outcomes at three and nine months after good neurological recovery from aneurysmal subarachnoid haemorrhage: predictors and prognosis. *J Neurol Neurosurg Psychiatry* 2002;72:772-81.

10. Kreiter KT, Copeland D, Bernardini GL, *et al.* Predictors of cognitive dysfunction after subarachnoid hemorrhage. *Stroke* 2002;33:200-8.
11. Mayer SA, Kreiter KT, Copeland D, *et al.* Global and domain-specific cognitive impairment and outcome after subarachnoid hemorrhage. *Neurology* 2002;59:1750-8.
12. Orbo M, Waterloo K, Egge A, *et al.* Predictors for cognitive impairment one year after surgery for aneurysmal subarachnoid hemorrhage. *J Neurol* 2008;255:1770-6.
13. Wong GK, Wong R, Mok VC, *et al.* Clinical study on cognitive dysfunction after spontaneous subarachnoid haemorrhage: patient profiles and relationship to cholinergic dysfunction. *Acta Neurochir (Wien)* 2009;151:1601-7.
14. Al-Khindi T, Macdonald RL, Schweizer TA. Cognitive and functional outcome after aneurysmal subarachnoid hemorrhage. *Stroke* 2010;41:e519-36.
15. Yeo SS, Choi BY, Chang CH, *et al.* Evidence of corticospinal tract injury at midbrain in patients with subarachnoid hemorrhage. *Stroke* 2012;43:2239-41.
16. Sheldon S, Macdonald RL, Schweizer TA. Free recall memory performance after aneurysmal subarachnoid hemorrhage. *J Int Neuropsychol Soc* 2012;18:334-42.
17. Smith B. Cerebral Pathology in Subarachnoid Haemorrhage. *J Neurol Neurosurg Psychiatry* 1963;26:535-9.
18. Grote E, Hassler W. The critical first minutes after subarachnoid hemorrhage. *Neurosurgery* 1988;22:654-61.
19. Hardemark HG, Almqvist O, Johansson T, *et al.* S-100 protein in cerebrospinal fluid after aneurysmal subarachnoid haemorrhage: relation to functional outcome, late CT and SPECT changes, and signs of higher cortical dysfunction. *Acta Neurochir (Wien)* 1989;99:135-44.
20. Jackowski A, Crockard A, Burnstock G, *et al.* The time course of intracranial pathophysiological changes following experimental subarachnoid haemorrhage in the



- 1  
2  
3  
4 rat. *J Cereb Blood Flow Metab* 1990;10:835-49.
- 5  
6 21. Germano AF, Dixon CE, d'Avella D, *et al.* Behavioral deficits following experimental  
7  
8 subarachnoid hemorrhage in the rat. *J Neurotrauma* 1994;11:345-53.
- 9  
10  
11 22. Germano A, Caruso G, Caffo M, *et al.* Does subarachnoid blood extravasation per se  
12  
13 induce long-term neuropsychological and cognitive alterations? *Acta Neurochir*  
14  
15 (*Wien*) 1998;140:805-11; discussion 11-2.
- 16  
17 23. Chua CO, Chahboune H, Braun A, *et al.* Consequences of intraventricular  
18  
19 hemorrhage in a rabbit pup model. *Stroke* 2009;40:3369-77.
- 20  
21  
22 24. Hong JH, Choi BY, Chang CH, *et al.* Injuries of the cingulum and fornix after rupture  
23  
24 of an anterior communicating artery aneurysm: a diffusion tensor tractography study.  
25  
26 *Neurosurgery* 2012;70:819-23.
- 27  
28 25. Fisher CM, Kistler JP, Davis JM. Relation of cerebral vasospasm to subarachnoid  
29  
30 hemorrhage visualized by computerized tomographic scanning. *Neurosurgery*  
31  
32 1980;6:1-9.
- 33  
34 26. Dick JP, Guiloff RJ, Stewart A, *et al.* Mini-mental state examination in neurological  
35  
36 patients. *J Neurol Neurosurg Psychiatry* 1984;47:496-9.
- 37  
38  
39 27. Smith SM, Jenkinson M, Woolrich MW, *et al.* Advances in functional and structural  
40  
41 MR image analysis and implementation as FSL. *Neuroimage* 2004;23 Suppl 1:S208-  
42  
43 19.
- 44  
45 28. Behrens TE, Johansen-Berg H, Woolrich MW, *et al.* Non-invasive mapping of  
46  
47 connections between human thalamus and cortex using diffusion imaging. *Nat*  
48  
49 *Neurosci* 2003;6:750-7.
- 50  
51  
52 29. Behrens TE, Berg HJ, Jbabdi S, *et al.* Probabilistic diffusion tractography with  
53  
54 multiple fibre orientations: What can we gain? *Neuroimage* 2007;34:144-55.
- 55  
56  
57 30. Rea LM, Parker RA: Designing and conducting survey research : a comprehensive  
58  
59  
60

- 1  
2  
3  
4 guide, ed 3rd. San Francisco: Jossey-Bass; 2005.
- 5  
6 31. Assaf Y, Pasternak O. Diffusion tensor imaging (DTI)-based white matter mapping in  
7  
8 brain research: a review. *J Mol Neurosci* 2008;34:51-61.
- 9  
10 32. Kwak SY, Yeo SS, Choi BY, *et al.* Corticospinal tract change in the unaffected  
11  
12 hemisphere at the early stage of intracerebral hemorrhage: a diffusion tensor  
13  
14 tractography study. *Eur Neurol* 2010;63:149-53.
- 15  
16 33. Folstein MF, Folstein SE, McHugh PR. "Mini-mental state". A practical method for  
17  
18 grading the cognitive state of patients for the clinician. *J Psychiatr Res* 1975;12:189-  
19  
20 98.
- 21  
22 34. Liu Y, Soppi V, Mustonen T, *et al.* Subarachnoid hemorrhage in the subacute stage:  
23  
24 elevated apparent diffusion coefficient in normal-appearing brain tissue after  
25  
26 treatment. *Radiology* 2007;242:518-25.
- 27  
28 35. Jang SH. Somatotopic arrangement and location of the corticospinal tract in the  
29  
30 brainstem of the human brain. *Yonsei Med J* 2011;52:553-7.
- 31  
32 36. Yamada K, Sakai K, Akazawa K, *et al.* MR tractography: a review of its clinical  
33  
34 applications. *Magn Reson Med Sci* 2009;8:165-74.
- 35  
36 37. Lee SK, Kim DI, Kim J, *et al.* Diffusion-tensor MR imaging and fiber tractography: a  
37  
38 new method of describing aberrant fiber connections in developmental CNS  
39  
40 anomalies. *Radiographics* 2005;25:53-65; discussion 6-8.
- 41  
42  
43  
44  
45  
46  
47  
48  
49  
50  
51  
52  
53  
54  
55  
56  
57  
58  
59  
60

**Figure legend**

**Fig 1.** Diffusion tensor tractography (DTT) for the mammillothalamic tract (MTT). Brain CT shows subarachnoid hemorrhage and the MTTs in both hemispheres of a patient (34-year old male) are reconstructed between the mammillary body and the anterior thalamus. However, the right MTT (red) of the patient is thinned, compared with the left MTT (green) of the patients and normal control subjects.

1  
2  
3  
4  
5  
6  
7  
8  
9  
10  
11  
12  
13  
14  
15  
16  
17  
18  
19  
20  
21  
22  
23  
24  
25  
26  
27  
28  
29  
30  
31  
32  
33  
34  
35  
36  
37  
38  
39  
40  
41  
42  
43  
44  
45  
46  
47  
48  
49  
50  
51  
52  
53  
54  
55  
56  
57  
58  
59  
60

**Fig. 2.** The incidence of injury of the mammillothalamic tract

(FA: fractional anisotropy, MTT: mammillothalamic tract, TV: tract volume)

For peer review only

**Table 1.** Demographic data for the patient and control groups.

|                                          | Patient group ( <i>n</i> =16) | Control group ( <i>n</i> =15) |
|------------------------------------------|-------------------------------|-------------------------------|
| Age (year)                               | 51.6±13.3                     | 48.1±15.1                     |
| Sex, male/female                         | 9 / 7                         | 7 / 8                         |
| Duration from onset (weeks)              | 5.7 ± 1.5                     |                               |
| Fisher's grading                         | 3.4±0.5                       |                               |
| Ruptured artery<br>(ACoA:ACA:MCA:PCA)    | 11:1:3:1                      |                               |
| Operation type<br>(clipping:coiling:non) | 12:2:2                        |                               |
| MMSE                                     | 19.8±8.8                      |                               |

SAH: subarachnoid hemorrhage, ACoA: anterior communicating, ACA: anterior cerebral artery, MCA: middle cerebral artery, PCA: posterior communicating artery, MMSE: Mini-mental state examination

**Table 2.** Results of diffusion tensor tractography parameters of the mammillothalamic tract in the patient and control groups.

|               | Hemisphere | FA          | <i>p</i> | Tract volume  | <i>p</i> |
|---------------|------------|-------------|----------|---------------|----------|
| Patient group | Right      | 0.36 (0.04) |          | 69.08 (30.33) |          |
|               | Left       | 0.35 (0.04) |          | 78.86 (28.80) |          |
|               | Both       | 0.36 (0.04) | .015*    | 74.15 (23.39) | .000*    |
| Control group | Right      | 0.38 (0.04) |          | 96.80 (22.7)  |          |
|               | Left       | 0.37 (0.03) |          | 99.73 (23.8)  |          |
|               | Both       | 0.38 (0.03) |          | 98.27 (22.9)  |          |

Values represent mean ( $\pm$ standard deviation), FA: fractional anisotropy, *p*: An independent t-test for determination of variances in FA and tract volume between the patient and control groups.

\* *p* < .05

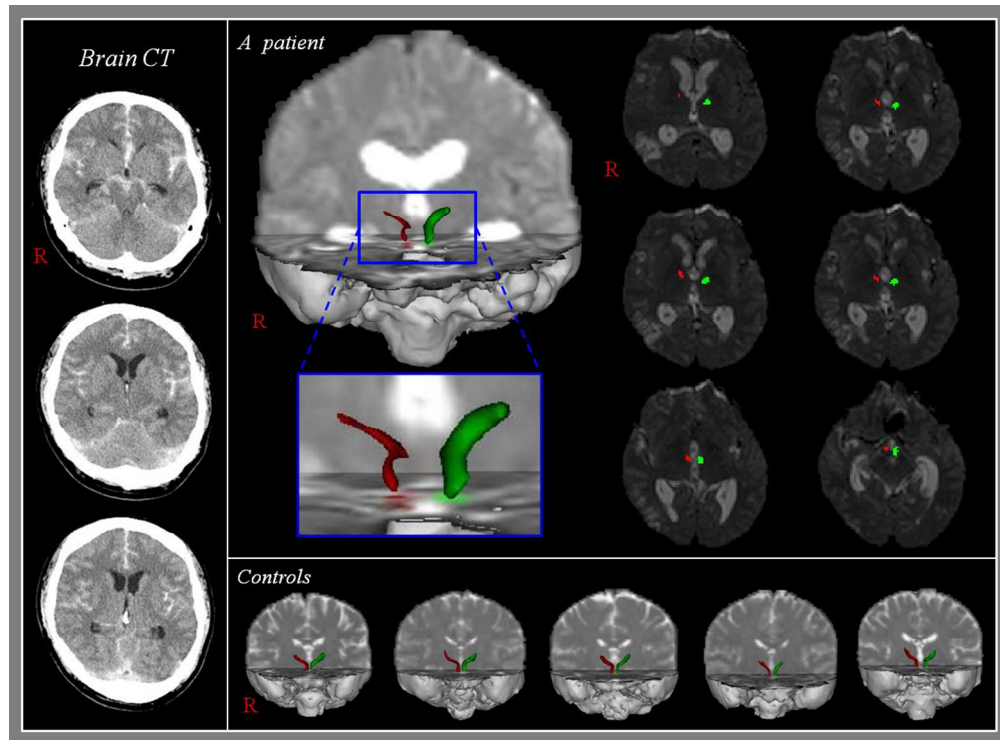

Fig 1. Diffusion tensor tractography (DTT) for the mammillothalamic tract (MTT). Brain CT shows subarachnoid hemorrhage and the MTTs in both hemispheres of a patient (34-year old male) are reconstructed between the mammillary body and the anterior thalamus. However, the right MTT (red) of the patient is thinned, compared with the left MTT (green) of the patients and normal control subjects. 148x109mm (300 x 300 DPI)

1  
2  
3  
4  
5  
6  
7  
8  
9  
10  
11  
12  
13  
14  
15  
16  
17  
18  
19  
20  
21  
22  
23  
24  
25  
26  
27  
28  
29  
30  
31  
32  
33  
34  
35  
36  
37  
38  
39  
40  
41  
42  
43  
44  
45  
46  
47  
48  
49  
50  
51  
52  
53  
54  
55  
56  
57  
58  
59  
60

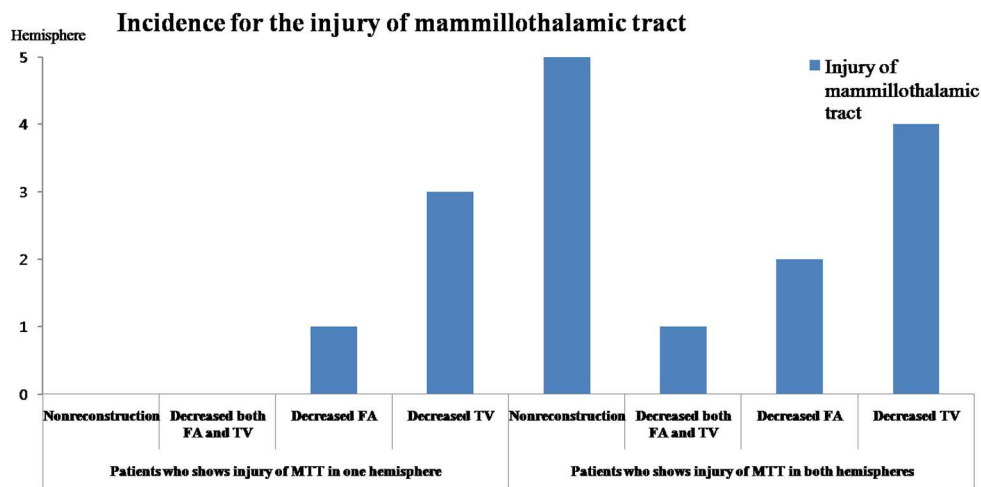

Fig. 2. The incidence of injury of the mammillothalamic tract (FA: fractional anisotropy, MTT: mammillothalamic tract, TV: tract volume)

216x109mm (300 x 300 DPI)

review only



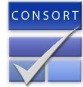

## CONSORT 2010 checklist of information to include when reporting a randomised trial\*

| Section/Topic                    | Item No | Checklist item                                                                                                                                                                              | Reported on page No |
|----------------------------------|---------|---------------------------------------------------------------------------------------------------------------------------------------------------------------------------------------------|---------------------|
| <b>Title and abstract</b>        |         |                                                                                                                                                                                             |                     |
|                                  | 1a      | Identification as a randomised trial in the title                                                                                                                                           |                     |
|                                  | 1b      | Structured summary of trial design, methods, results, and conclusions (for specific guidance see CONSORT for abstracts)                                                                     | 4                   |
| <b>Introduction</b>              |         |                                                                                                                                                                                             |                     |
| Background and objectives        | 2a      | Scientific background and explanation of rationale                                                                                                                                          | 5                   |
|                                  | 2b      | Specific objectives or hypotheses                                                                                                                                                           | 5                   |
| <b>Methods</b>                   |         |                                                                                                                                                                                             |                     |
| Trial design                     | 3a      | Description of trial design (such as parallel, factorial) including allocation ratio                                                                                                        | 6                   |
|                                  | 3b      | Important changes to methods after trial commencement (such as eligibility criteria), with reasons                                                                                          | 6-7                 |
| Participants                     | 4a      | Eligibility criteria for participants                                                                                                                                                       | 6                   |
|                                  | 4b      | Settings and locations where the data were collected                                                                                                                                        |                     |
| Interventions                    | 5       | The interventions for each group with sufficient details to allow replication, including how and when they were actually administered                                                       |                     |
| Outcomes                         | 6a      | Completely defined pre-specified primary and secondary outcome measures, including how and when they were assessed                                                                          | 6-7                 |
|                                  | 6b      | Any changes to trial outcomes after the trial commenced, with reasons                                                                                                                       |                     |
| Sample size                      | 7a      | How sample size was determined                                                                                                                                                              | 6                   |
|                                  | 7b      | When applicable, explanation of any interim analyses and stopping guidelines                                                                                                                |                     |
| <b>Randomisation:</b>            |         |                                                                                                                                                                                             |                     |
| Sequence generation              | 8a      | Method used to generate the random allocation sequence                                                                                                                                      | 6                   |
|                                  | 8b      | Type of randomisation; details of any restriction (such as blocking and block size)                                                                                                         |                     |
| Allocation concealment mechanism | 9       | Mechanism used to implement the random allocation sequence (such as sequentially numbered containers), describing any steps taken to conceal the sequence until interventions were assigned |                     |
| Implementation                   | 10      | Who generated the random allocation sequence, who enrolled participants, and who assigned participants to interventions                                                                     | 6                   |
| Blinding                         | 11a     | If done, who was blinded after assignment to interventions (for example, participants, care providers, those                                                                                |                     |

|    |                          |                                                                                                                     |       |
|----|--------------------------|---------------------------------------------------------------------------------------------------------------------|-------|
| 1  |                          |                                                                                                                     |       |
| 2  |                          | assessing outcomes) and how                                                                                         |       |
| 3  |                          |                                                                                                                     |       |
| 4  |                          | 11b If relevant, description of the similarity of interventions                                                     |       |
| 5  | Statistical methods      | 12a Statistical methods used to compare groups for primary and secondary outcomes                                   | 6     |
| 6  |                          | 12b Methods for additional analyses, such as subgroup analyses and adjusted analyses                                | 6     |
| 7  |                          |                                                                                                                     |       |
| 8  | <b>Results</b>           |                                                                                                                     |       |
| 9  | Participant flow (a      | 13a For each group, the numbers of participants who were randomly assigned, received intended treatment, and        |       |
| 10 | diagram is strongly      | were analysed for the primary outcome                                                                               |       |
| 11 | recommended)             | 13b For each group, losses and exclusions after randomisation, together with reasons                                |       |
| 12 | Recruitment              | 14a Dates defining the periods of recruitment and follow-up                                                         |       |
| 13 |                          | 14b Why the trial ended or was stopped                                                                              |       |
| 14 |                          |                                                                                                                     |       |
| 15 | Baseline data            | 15 A table showing baseline demographic and clinical characteristics for each group                                 |       |
| 16 | Numbers analysed         | 16 For each group, number of participants (denominator) included in each analysis and whether the analysis was      |       |
| 17 |                          | by original assigned groups                                                                                         |       |
| 18 |                          |                                                                                                                     |       |
| 19 | Outcomes and             | 17a For each primary and secondary outcome, results for each group, and the estimated effect size and its           | 9-10  |
| 20 | estimation               | precision (such as 95% confidence interval)                                                                         |       |
| 21 |                          | 17b For binary outcomes, presentation of both absolute and relative effect sizes is recommended                     |       |
| 22 | Ancillary analyses       | 18 Results of any other analyses performed, including subgroup analyses and adjusted analyses, distinguishing       | 9-10  |
| 23 |                          | pre-specified from exploratory                                                                                      |       |
| 24 |                          |                                                                                                                     |       |
| 25 | Harms                    | 19 All important harms or unintended effects in each group (for specific guidance see CONSORT for harms)            |       |
| 26 |                          |                                                                                                                     |       |
| 27 | <b>Discussion</b>        |                                                                                                                     |       |
| 28 | Limitations              | 20 Trial limitations, addressing sources of potential bias, imprecision, and, if relevant, multiplicity of analyses | 12-13 |
| 29 | Generalisability         | 21 Generalisability (external validity, applicability) of the trial findings                                        |       |
| 30 | Interpretation           | 22 Interpretation consistent with results, balancing benefits and harms, and considering other relevant evidence    |       |
| 31 |                          |                                                                                                                     |       |
| 32 | <b>Other information</b> |                                                                                                                     |       |
| 33 | Registration             | 23 Registration number and name of trial registry                                                                   |       |
| 34 | Protocol                 | 24 Where the full trial protocol can be accessed, if available                                                      |       |
| 35 | Funding                  | 25 Sources of funding and other support (such as supply of drugs), role of funders                                  | 13    |
| 36 |                          |                                                                                                                     |       |

37

38 \*We strongly recommend reading this statement in conjunction with the CONSORT 2010 Explanation and Elaboration for important clarifications on all the items. If relevant, we also

39 recommend reading CONSORT extensions for cluster randomised trials, non-inferiority and equivalence trials, non-pharmacological treatments, herbal interventions, and pragmatic trials.

40 Additional extensions are forthcoming: for those and for up to date references relevant to this checklist, see [www.consort-statement.org](http://www.consort-statement.org).

41

42

# BMJ Open

## Injury of the mammillothalamic tract in patients with subarachnoid hemorrhage: a retrospective diffusion tensor imaging study

|                                 |                                                                                                                                                                                                                                                                                                                                                                                                                                                                                                              |
|---------------------------------|--------------------------------------------------------------------------------------------------------------------------------------------------------------------------------------------------------------------------------------------------------------------------------------------------------------------------------------------------------------------------------------------------------------------------------------------------------------------------------------------------------------|
| Journal:                        | <i>BMJ Open</i>                                                                                                                                                                                                                                                                                                                                                                                                                                                                                              |
| Manuscript ID:                  | bmjopen-2014-005613.R1                                                                                                                                                                                                                                                                                                                                                                                                                                                                                       |
| Article Type:                   | Research                                                                                                                                                                                                                                                                                                                                                                                                                                                                                                     |
| Date Submitted by the Author:   | 14-Jun-2014                                                                                                                                                                                                                                                                                                                                                                                                                                                                                                  |
| Complete List of Authors:       | Jang, Sung Ho; College of Medicine, Yeungnam University, Physical Medicine and Rehabilitation<br>Choi, Byung Yeon; College of Medicine, Yeungnam University, Neurosurgery<br>Kim, Seong Ho; College of Medicine, Yeungnam University, Neurosurgery<br>Chang, Chul Hoon; College of Medicine, Yeungnam University, Neurosurgery<br>Jung, Young Jin; College of Medicine, Yeungnam University, Neurosurgery<br>Kwon, Hyeok Gyu; College of Medicine, Yeungnam University, Physical Medicine and Rehabilitation |
| <b>Primary Subject Heading</b>: | Rehabilitation medicine                                                                                                                                                                                                                                                                                                                                                                                                                                                                                      |
| Secondary Subject Heading:      | Neurology                                                                                                                                                                                                                                                                                                                                                                                                                                                                                                    |
| Keywords:                       | REHABILITATION MEDICINE, Magnetic resonance imaging < RADIOLOGY & IMAGING, Neurological injury < NEUROLOGY                                                                                                                                                                                                                                                                                                                                                                                                   |
|                                 |                                                                                                                                                                                                                                                                                                                                                                                                                                                                                                              |

SCHOLARONE™  
Manuscripts

1  
2  
3  
4 **Title: Injury of the mammillothalamic tract in patients with subarachnoid hemorrhage:**  
5 **a retrospective diffusion tensor imaging study**  
6  
7

8 **Running title: Injury of the mammillothalamic tract**  
9  
10

11  
12  
13 Author 1: Sung Ho Jang, MD

14 Department of Physical Medicine and Rehabilitation, College of Medicine, Yeungnam  
15 University  
16

17 e-mail: [strokerehab@hanmail.net](mailto:strokerehab@hanmail.net)  
18  
19

20  
21 Author 2 : Byung Yeon Choi, MD

22 Department of Neurosurgery, College of Medicine, Yeungnam University  
23

24 e-mail: [bychoi@med.yu.ac.kr](mailto:bychoi@med.yu.ac.kr)  
25  
26

27  
28 Author 3 : Seong Ho Kim, MD

29 Department of Neurosurgery, College of Medicine, Yeungnam University  
30

31 e-mail: [shkim@medical.yeungnam.ac.kr](mailto:shkim@medical.yeungnam.ac.kr)  
32  
33

34  
35 Author 4 : Chul Hoon Chang, MD

36 Department of Neurosurgery, College of Medicine, Yeungnam University  
37

38 e-mail: [cch0102@yumail.ac.kr](mailto:cch0102@yumail.ac.kr)  
39  
40

41  
42 Author 5: Young Jin Jung, MD

43 Department of Neurosurgery, College of Medicine, Yeungnam University  
44

45 e-mail: [sofesofe@hanmail.net](mailto:sofesofe@hanmail.net)  
46  
47

48 Author 6 (Corresponding author): Hyeok Gyu Kwon, MS

49 Department of Physical Medicine and Rehabilitation, College of Medicine, Yeungnam  
50 University  
51  
52

1  
2  
3  
4 Mailing Address: Department of Physical Medicine and Rehabilitation, College of Medicine,  
5 Yeungnam University 317-1, Daemyung dong, Namku, Daegu, 705-717, Republic of Korea  
6  
7 Tel: 82-53-620-4098      FAX: 82-53-625-3508      e-mail: khg0715@hanmail.net  
8  
9  
10  
11  
12  
13  
14  
15  
16  
17  
18  
19  
20  
21  
22  
23  
24  
25  
26  
27  
28  
29  
30  
31  
32  
33  
34  
35  
36  
37  
38  
39  
40  
41  
42  
43  
44  
45  
46  
47  
48  
49  
50  
51  
52  
53  
54  
55  
56  
57  
58  
59  
60

For peer review only

**Abstract**

**Objective:** Few studies have reported on injury of the mammillothalamic tract (MTT) in stroke patients. However, no study in patients with subarachnoid hemorrhage (SAH) has been reported. Using diffusion tensor tractography (DTT), we attempted to investigate injury of the MTT in patients with subarachnoid hemorrhage.

**Methods:** We recruited 16 patients with SAH and 15 control subjects. Diffusion tensor imaging (DTI) was obtained at  $5.7 \pm 1.5$  weeks after onset and reconstruction of the MTT was performed using the probabilistic tractography method. The fractional anisotropy (FA) value and tract number of the MTT and the Mini-Mental State Examination (MMSE) score were determined. Values of FA and tract volume showing decrement of more than two standard deviations that of normal control were defined as abnormal.

**Results:** The FA value and tract volume in the patient group were significantly lower than those of the control group ( $p < .05$ ). In addition, MMSE showed strong ( $r = 0.67$ ,  $p = 0.005$ ) positive correlation with tract volume without correlation with FA. In the individual analysis, 16 MTTs of 32 MTTs in 16 patients showed abnormalities of the MTT in terms of the FA value, the tract volume, or the presence of a reconstructed MTT. As a result, ten (62.5%) of 16 patients showed abnormality of the MTT in at least one hemisphere.

**Conclusion:** We found that patients with SAH showed injury of the MTT and this injury showed correlation with cognitive dysfunction.

**Keywords:** Mammillothalamic tract, Subarachnoid hemorrhage, Diffusion tensor tractography

### Strengths and limitations of this study

- This is the first study on the injury of the mammillothalamic tract (MTT) in patients with subarachnoid hemorrhage (SAH) using diffusion tensor imaging (DTI).
- The main strength of our study is to find the relation between MTT injury and cognitive function with SAH
- Limitation of our study is that fiber tracking of the MTT might be affected by artifact, such as an aneurysmal clip. Therefore, conduct of further studies to overcome this limitation would be necessary.

## Introduction

The mammillothalamic tract (MTT) connects the mammillary body and the anterior thalamus as a part of the Papez circuit.<sup>1</sup> Because of the anatomical characteristics of the MTT, thin, short, and located deep within the brain, accurate estimation of the MTT has been difficult in the live human brain. However, diffusion tensor tractography (DTT), which is derived from diffusion tensor imaging (DTI), allows for reconstruction of the MTT in the human brain.<sup>2</sup> Therefore, accurate estimation of the MTT in terms of DTI parameters and three-dimensional configuration is now possible.<sup>2</sup> A few studies have reported on injury of the MTT in thalamic hemorrhage and thalamic infarct, however, so far, little is known about injury of the MTT.<sup>3 4</sup>

Subarachnoid hemorrhage (SAH) is extravasation of blood into the subarachnoid space accompanied by various neurological sequelae in terms of memory, executive function, language, motor function, and cranial nerve function.<sup>5-16</sup> In particular, memory deficit is known to be one of the most common sequelae of SAH.<sup>7 8 10 11 14</sup> In the past, previous studies have suggested that the neurotoxic effects of blood, vasospasm, or increased intracranial pressure are pathogenic mechanisms of neural sequelae following SAH.<sup>5 7 17-23</sup> After introduction of DTI, among the neural tracts associated with memory, injuries in the fornix and cingulum were reported in patients with SAH.<sup>24</sup> However, no study on neural injury of the MTT in patients with SAH has been reported.

In the current study, using DTT, we attempted to investigate injury of the MTT in patients with SAH.



## Methods

### Subjects

We recruited 16 patients with SAH (male: 9, female: 7, mean age: 51.6±13.3 years, range: 34~70 years) and 15 normal healthy control subjects (male: 7, female: 8, mean age: 48.1±15.1 years, range: 20~67 years) with no previous history of neurological, physical, or psychiatric illness for this study. Inclusion criteria for patients were as follows: (1) first ever stroke, (2) age 30~70 years, (3) hemorrhage in the subarachnoid space due to aneurismal rupture confirmed by a neuroradiologist, (4) DTI was scanned at a chronic stage after onset, and (5) no hydrocephalus, intracerebral hemorrhage, or intraventricular hemorrhage. Severity of SAH was assessed according to the modified Fisher CT grade, World Federation of Neurosurgical Societies (WFNS) and Hijdra score.<sup>25-27</sup> Patients who showed any lesion or artifact due to the clipping or coiling along or around the MTT pathway between the mammillary body and thalamus were excluded. This study was conducted retrospectively and the study protocol was approved by the Institutional Review Board of a university hospital.

---

Figure 1

---

### Clinical evaluation

Cognitive function was evaluated at the time of DTI scanning. The mini-mental state examination (MMSE) was used for assessment of cognitive impairment. The reliability and validity of the MMSE have been well established.<sup>28</sup>

## Diffusion tensor tractography

A 6-channel head coil on a 1.5 T Philips Gyroscan Intera (Philips, Ltd, Best, The Netherlands) with single-shot echo-planar imaging was used for acquisition of DTI data. For each of the 32 non-collinear diffusion sensitizing gradients, we acquired 67 contiguous slices parallel to the anterior commissure-posterior commissure line. Imaging parameters were as follows: acquisition matrix =  $96 \times 96$ ; reconstructed to matrix =  $128 \times 128$ ; field of view =  $221 \times 221 \text{ mm}^2$ ; TR = 10,726 ms; TE = 76 ms; parallel imaging reduction factor (SENSE factor) = 2; EPI factor = 49;  $b = 1000 \text{ s/mm}^2$ ; NEX = 1; and a slice thickness of 2.3 mm (acquired voxel size  $1.73 \times 1.73 \times 2.3 \text{ mm}^3$ ). Affine multi-scale two-dimensional registration using the Oxford Centre for Functional Magnetic Resonance Imaging of Brain (FMRIB) Software Library (FSL; [www.fmrib.ox.ac.uk/fsl](http://www.fmrib.ox.ac.uk/fsl)) was used for removal of eddy current-induced image distortions.<sup>29</sup> Fiber tracking was performed using a probabilistic tractography method based on a multi-fiber model, and applied in the current study utilizing tractography routines implemented in FMRIB Diffusion (5000 streamline samples, 0.5 mm step lengths, curvature thresholds = 0.2).<sup>29-31</sup> MTTs were determined by selection of fibers passing through three regions of interest (ROIs). Seed ROIs were placed on the mammillary body on the axial image.<sup>2</sup> Two target ROIs were drawn at the portion of the MTT area (between the portion of the fornix and the red nucleus in the anteroposterior direction) at about the bicommissural level and the portion of the anterior thalamus on the axial image.<sup>2</sup> Of 5000 samples generated from each seed voxel, results for each contact were the visualized threshold point at 5 streamline through each voxel for analysis. Values of fractional anisotropy (FA) and tract volume which was determined by counting the voxels of MTT were measured using MATLAB<sup>TM</sup> (Matlab R2007b, The Mathworks, Natick, MA, USA). Values of FA and tract

1  
2  
3  
4 volume showing decrement of more than two standard deviations that of normal control were  
5  
6 defined as abnormal.  
7  
8

### 9 **Statistical analysis**

10  
11  
12 We used SPSS software (v.15.0; SPSS, Chicago, IL) for data analysis. Data on MTTs  
13  
14 that were not reconstructed were excluded in statistical analysis. An independent t-test was  
15  
16 used for determination of variances in the value of FA and tract volume between the patient  
17  
18 and control group. Subsequently, using Pearson correlation, DTT parameters for FA and tract  
19  
20 volume of the patient group were used in determination of correlation with MMSE.<sup>32</sup> The  
21  
22 significant level of the *p* value was set at 0.05.  
23  
24  
25  
26  
27  
28  
29  
30  
31  
32  
33  
34  
35  
36  
37  
38  
39  
40  
41  
42  
43  
44  
45  
46  
47  
48  
49  
50  
51  
52  
53  
54  
55  
56  
57  
58  
59  
60

## Results

A summary of the demographic data for the patient and control groups is shown in Table 1. The artery distribution of aneurismal rupture for SAH in 16 patients was as follows: the anterior communicating artery: 11 patients (68.8%), the middle cerebral artery: three patients (18.8%), the posterior communicating artery: one patient (6.2%), and the anterior cerebral artery: one patient (6.2%). In addition, 12 patients (75%) patients underwent aneurysmal clipping and two patients underwent endovascular coiling (12.5%). The two remaining patients (12.5%) received conservative treatment. Average MMSE was  $19.8 \pm 8.8$ . Average modified Fisher CT grade, WFNS, and Hijdra score were  $2.5 \pm 0.9$ ,  $2.1 \pm 1.3$ , and  $15.7 \pm 6.3$ , respectively.<sup>25-28</sup> DTI scanning was performed at  $5.7 \pm 1.5$  weeks (range: 4~8 weeks) after SAH onset.

---

Table 1

---

A summary of the results of DTT parameters for MTT in the patient and control groups is shown in Table 2. Values for FA and tract volume were significantly lower in the patient group than in the control group, respectively ( $p < .05$ ). The tract volume of the MTT showed strong ( $r = 0.67$ ,  $p = 0.005$ ) positive correlation with MMSE, however, no correlation was observed between the FA value of MTT and MMSE ( $r = 0.41$ ,  $p = 0.11$ ).<sup>32</sup>

---

Table 2

---

Figure 2 shows the results for incidence of injury of the MTT with DTT parameters. Among 32 hemispheres of 16 patients, the MTT was not reconstructed in five hemispheres of four patients (right hemisphere: two, left hemisphere: one, both hemispheres: one); in contrast,

1  
2  
3  
4 the MTTs were reconstructed in all 30 hemispheres of 15 control subjects. With regard to the  
5  
6 FA and tract volume, nine MTTs in six patients (right hemisphere: one, left hemisphere: two,  
7  
8 both hemispheres: three) and 13 MTTs in nine patients (right hemisphere: four, left  
9  
10 hemisphere: one, both hemispheres: four) of 32 hemispheres in 16 patients revealed a  
11  
12 decrement of more than two standard deviations, compared with control subjects. Six MTTs  
13  
14 in five patients (right hemisphere: three, left hemisphere: one, both hemispheres: one) showed  
15  
16 a decrement of more than two standard deviations in both FA and tract volume. As a result,  
17  
18 16 MTTs (right hemisphere: two, left hemisphere: two, both hemispheres: six) of 32 MTTs in  
19  
20 16 patients showed abnormalities of the MTT. Three patients in one hemisphere and one  
21  
22 patient in both hemispheres whose MTT was not reconstructed belonged to these 16 patients.  
23  
24 Consequently, in the individual analysis, the prevalence of MTT abnormality was 62.5% (10  
25  
26 of 16 patients).  
27  
28  
29  
30

---

31  
32 Fig 2  
33  
34  
35  
36  
37  
38  
39  
40  
41  
42  
43  
44  
45  
46  
47  
48  
49  
50  
51  
52  
53  
54  
55  
56  
57  
58  
59  
60

---

## Discussion

In the current study, we investigated injury of the MTT in patients with SAH using DTT. We obtained the following results: 1) the FA value and tract volume in the patient group were significantly lower than those of the control group, 2) MMSE showed strong ( $r=0.67$ ,  $p=0.005$ ) positive correlation with tract volume without correlation with FA value, 3) in the individual analysis, 16 MTTs of 32 MTTs in 16 patients showed abnormalities of the MTT in terms of the FA value, tract volume, or the presence of a reconstructed MTT. As a result, ten (62.5%) of 16 patients showed abnormality of the MTT in at least one hemisphere. The FA value indicates the degree of directionality of water diffusion and has a range of zero (completely isotropic diffusion) to one (completely anisotropic diffusion). It represents the white matter organization: in detail, the degree of directionality and integrity of white matter microstructures such as axons, myelin, and microtubules.<sup>33</sup> In contrast, tract volume, the number of voxels in a neural tract, reflects the neural fibers contained within a neural tract.<sup>34</sup> Therefore, a decrease in the FA or tract volume indicates an injury of the neural tract. Consequently, our results showing that the FA value and tract volume in the patient group were significantly lower than those of the control group indicate injury of the MTT in the patient group. Regarding the relation between MTT injury and cognition, MMSE showed strong positive correlation with the tract volume of the MTT without correlation with FA.<sup>32</sup> These results appear to indicate that the tract volume is more sensitive than the FA value for detection of injury of the MTT. The MMSE is the most widely used tool for screening cognitive dysfunction.<sup>35</sup> Because this study was conducted retrospectively, we could not employ detailed neuropsychological testing for evaluation of the function of the MTT. Therefore, conduct of further prospective studies, including specific neurophysiological tests

1  
2  
3  
4 for MTT function should be encouraged.  
5  
6

7 The pathogenic mechanism of neural injury following SAH has not been elucidated and  
8 few DTI studies have reported on this mechanism.<sup>15 36</sup> In 2007, Liu et al. demonstrated that  
9 SAH caused global mild vasogenic edema in white matter and deep gray matter by measuring  
10 the apparent diffusion coefficient value in the subacute stage of SAH, which was  
11 undetectable on T2-weighted and diffusion-weighted MR images.<sup>36</sup> In a recent study, Yeo et  
12 al. [2012] reported injury of the CST at the midbrain in patients with SAH.<sup>15</sup> This study  
13 suggested that frequent occurrence of SAH into perimesencephalic cisterns could be ascribed  
14 to injury of the CST, through mechanical (increased intracranial pressure or direct mass) or  
15 chemical mechanisms (a blood clot itself can cause extensive damage).<sup>5 23 37</sup> Considering that  
16 the MTT is located in close proximity to a cistern, the MTT in patients with SAH appears to  
17 be injured by mechanisms similar to those of CST injury at the midbrain.<sup>5 15 17 18 23</sup>  
18  
19  
20  
21  
22  
23  
24  
25  
26  
27  
28  
29  
30  
31

32 As for injury of the MTT, to the best of our knowledge, one study was reported in  
33 patients with thalamic hemorrhage.<sup>3</sup> Therefore, this is the first DTI study on injury of the  
34 MTT in patients with SAH. However, several limitations of DTI should be considered.<sup>38 39</sup>  
35 First, DTI is a powerful anatomic imaging tool that can demonstrate gross fiber architecture;  
36 however, reflection of all fibers, particularly small fibers, can be difficult. Second, fiber  
37 tracking of the MTT might be affected by artifact, such as an aneurysmal clip. Third, we  
38 investigated only injury of the MTT following SAH even though other tracts such as fornix,  
39 cingulum, thalamocortical tract of Papez circuit might be also injured. Therefore, conduct of  
40 further studies to overcome these limitations would be necessary.  
41  
42  
43  
44  
45  
46  
47  
48  
49  
50  
51

52  
53 In conclusion, we found injury of the MTT in the patient group, compared with the  
54  
55

1  
2  
3  
4 control group. In addition, in the individual analysis, 16 MTTs (50%) of 32 hemispheres  
5  
6 showed injury of the MTT and ten (62.5%) of 16 patients showed injury of the MTT in at  
7  
8 least in one hemisphere in terms of DTT parameters or the presence of a reconstructed MTT.  
9  
10  
11  
12  
13  
14  
15  
16  
17  
18  
19  
20  
21  
22  
23  
24  
25  
26  
27  
28  
29  
30  
31  
32  
33  
34  
35  
36  
37  
38  
39  
40  
41  
42  
43  
44  
45  
46  
47  
48  
49  
50  
51  
52  
53  
54  
55  
56  
57  
58  
59  
60

For peer review only



**Acknowledgement**

This research was supported by Basic Science Research Program through the National Research Foundation of Korea(NRF) funded by the Ministry of Education, Science and Technology(2012R1A1A4A01001873).

**Contributorship statement**

Sung Ho Jang: Conceiving and designing the study, funding, data acquisition, manuscript development and manuscript writing. Byung Yeon Choi: Acquisition and analysis of data, Seong Ho Kim: Research design and data acquisition. Chul Hoon Chang: Research design and data acquisition. Young Jin Jung: Research design and technical support. Hyeok Gyu Kwon: Manuscript development, data acquisition, manuscript writing and manuscript authorization.

**Competing interests**

None

**Funding**

This research was supported by Basic Science Research Program through the National Research Foundation of Korea(NRF) funded by the Ministry of Education, Science and Technology(2012R1A1A4A01001873).

**Data sharing statement**

No additional data are available.

**Ethics approval**

This study protocol was approved by the Institutional Review Board of the Yeungnam university hospital.

## References

1. Aggleton JP, Brown MW. Episodic memory, amnesia, and the hippocampal-anterior thalamic axis. *Behav Brain Sci* 1999;22:425-44; discussion 44-89.
2. Kwon HG, Hong JH, Jang SH. Mammillothalamic tract in human brain: diffusion tensor tractography study. *Neurosci Lett* 2010;481:51-3.
3. Jang SH, Lee HD, Kwon HG. Injury of the mammillothalamic tract in patients with thalamic hemorrhage. *Front Hum Neurosci* 2014;8:259.
4. Jang SH, Jun L, Kwon HG. Mystery Case: Injuries of neural tracts in the Papez circuit following anterior thalamic infarction. *Neurology* 2014;82:e178-9.
5. van Gijn J, van Dongen KJ, Vermeulen M, *et al.* Perimesencephalic hemorrhage: a nonaneurysmal and benign form of subarachnoid hemorrhage. *Neurology* 1985;35:493-7.
6. Ferrante L, Acqui M, Mastronardi L, *et al.* Posterior inferior cerebellar artery (PICA) aneurysm presenting with SAH and contralateral crural monoparesis: a case report. *Surg Neurol* 1992;38:43-5.
7. Ogden JA, Mee EW, Henning M. A prospective study of impairment of cognition and memory and recovery after subarachnoid hemorrhage. *Neurosurgery* 1993;33:572-86; discussion 86-7.
8. Ostbye T, Levy AR, Mayo NE. Hospitalization and case-fatality rates for subarachnoid hemorrhage in Canada from 1982 through 1991. The Canadian Collaborative Study Group of Stroke Hospitalizations. *Stroke* 1997;28:793-8.
9. Powell J, Kitchen N, Heslin J, *et al.* Psychosocial outcomes at three and nine months after good neurological recovery from aneurysmal subarachnoid haemorrhage:

- 1  
2  
3  
4 predictors and prognosis. *J Neurol Neurosurg Psychiatry* 2002;72:772-81.
- 5  
6 10. Kreiter KT, Copeland D, Bernardini GL, *et al.* Predictors of cognitive dysfunction  
7  
8 after subarachnoid hemorrhage. *Stroke* 2002;33:200-8.
- 9  
10  
11 11. Mayer SA, Kreiter KT, Copeland D, *et al.* Global and domain-specific cognitive  
12  
13 impairment and outcome after subarachnoid hemorrhage. *Neurology* 2002;59:1750-8.
- 14  
15  
16 12. Orbo M, Waterloo K, Egge A, *et al.* Predictors for cognitive impairment one year after  
17  
18 surgery for aneurysmal subarachnoid hemorrhage. *J Neurol* 2008;255:1770-6.
- 19  
20  
21 13. Wong GK, Wong R, Mok VC, *et al.* Clinical study on cognitive dysfunction after  
22  
23 spontaneous subarachnoid haemorrhage: patient profiles and relationship to  
24  
25 cholinergic dysfunction. *Acta Neurochir (Wien)* 2009;151:1601-7.
- 26  
27  
28 14. Al-Khindi T, Macdonald RL, Schweizer TA. Cognitive and functional outcome after  
29  
30 aneurysmal subarachnoid hemorrhage. *Stroke* 2010;41:e519-36.
- 31  
32  
33 15. Yeo SS, Choi BY, Chang CH, *et al.* Evidence of corticospinal tract injury at midbrain  
34  
35 in patients with subarachnoid hemorrhage. *Stroke* 2012;43:2239-41.
- 36  
37  
38 16. Sheldon S, Macdonald RL, Schweizer TA. Free recall memory performance after  
39  
40 aneurysmal subarachnoid hemorrhage. *J Int Neuropsychol Soc* 2012;18:334-42.
- 41  
42  
43 17. Smith B. Cerebral Pathology in Subarachnoid Haemorrhage. *J Neurol Neurosurg*  
44  
45 *Psychiatry* 1963;26:535-9.
- 46  
47  
48 18. Grote E, Hassler W. The critical first minutes after subarachnoid hemorrhage.  
49  
50 *Neurosurgery* 1988;22:654-61.
- 51  
52  
53 19. Hardemark HG, Almqvist O, Johansson T, *et al.* S-100 protein in cerebrospinal fluid  
54  
55 after aneurysmal subarachnoid haemorrhage: relation to functional outcome, late CT  
56  
57 and SPECT changes, and signs of higher cortical dysfunction. *Acta Neurochir (Wien)*  
58  
59  
60

- 1  
2  
3  
4 1989;99:135-44.  
5  
6 20. Jackowski A, Crockard A, Burnstock G, *et al.* The time course of intracranial  
7 pathophysiological changes following experimental subarachnoid haemorrhage in the  
8 rat. *J Cereb Blood Flow Metab* 1990;10:835-49.  
9  
10  
11  
12 21. Germano AF, Dixon CE, d'Avella D, *et al.* Behavioral deficits following experimental  
13 subarachnoid hemorrhage in the rat. *J Neurotrauma* 1994;11:345-53.  
14  
15  
16  
17 22. Germano A, Caruso G, Caffo M, *et al.* Does subarachnoid blood extravasation per se  
18 induce long-term neuropsychological and cognitive alterations? *Acta Neurochir*  
19 *(Wien)* 1998;140:805-11; discussion 11-2.  
20  
21  
22  
23 23. Chua CO, Chahboune H, Braun A, *et al.* Consequences of intraventricular  
24 hemorrhage in a rabbit pup model. *Stroke* 2009;40:3369-77.  
25  
26  
27  
28 24. Hong JH, Choi BY, Chang CH, *et al.* Injuries of the cingulum and fornix after rupture  
29 of an anterior communicating artery aneurysm: a diffusion tensor tractography study.  
30 *Neurosurgery* 2012;70:819-23.  
31  
32  
33  
34 25. Teasdale GM, Drake CG, Hunt W, *et al.* A universal subarachnoid hemorrhage scale:  
35 report of a committee of the World Federation of Neurosurgical Societies. *J Neurol*  
36 *Neurosurg Psychiatry* 1988;51:1457.  
37  
38  
39  
40 26. Hijdra A, Brouwers PJ, Vermeulen M, *et al.* Grading the amount of blood on  
41 computed tomograms after subarachnoid hemorrhage. *Stroke* 1990;21:1156-61.  
42  
43  
44  
45 27. Frontera JA, Claassen J, Schmidt JM, *et al.* Prediction of symptomatic vasospasm  
46 after subarachnoid hemorrhage: the modified fisher scale. *Neurosurgery* 2006;59:21-  
47 7; discussion -7.  
48  
49  
50  
51 28. Dick JP, Guiloff RJ, Stewart A, *et al.* Mini-mental state examination in neurological  
52  
53  
54  
55

- 1  
2  
3  
4 patients. *J Neurol Neurosurg Psychiatry* 1984;47:496-9.
- 5  
6 29. Smith SM, Jenkinson M, Woolrich MW, *et al.* Advances in functional and structural  
7  
8 MR image analysis and implementation as FSL. *Neuroimage* 2004;23 Suppl 1:S208-  
9  
10 19.
- 11  
12 30. Behrens TE, Johansen-Berg H, Woolrich MW, *et al.* Non-invasive mapping of  
13  
14 connections between human thalamus and cortex using diffusion imaging. *Nat*  
15  
16 *Neurosci* 2003;6:750-7.
- 17  
18 31. Behrens TE, Berg HJ, Jbabdi S, *et al.* Probabilistic diffusion tractography with  
19  
20 multiple fibre orientations: What can we gain? *Neuroimage* 2007;34:144-55.
- 21  
22 32. Rea LM, Parker RA: Designing and conducting survey research : a comprehensive  
23  
24 guide, ed 3rd. San Francisco: Jossey-Bass; 2005.
- 25  
26 33. Assaf Y, Pasternak O. Diffusion tensor imaging (DTI)-based white matter mapping in  
27  
28 brain research: a review. *J Mol Neurosci* 2008;34:51-61.
- 29  
30 34. Kwak SY, Yeo SS, Choi BY, *et al.* Corticospinal tract change in the unaffected  
31  
32 hemisphere at the early stage of intracerebral hemorrhage: a diffusion tensor  
33  
34 tractography study. *Eur Neurol* 2010;63:149-53.
- 35  
36 35. Folstein MF, Folstein SE, McHugh PR. "Mini-mental state". A practical method for  
37  
38 grading the cognitive state of patients for the clinician. *J Psychiatr Res* 1975;12:189-  
39  
40 98.
- 41  
42 36. Liu Y, Soppi V, Mustonen T, *et al.* Subarachnoid hemorrhage in the subacute stage:  
43  
44 elevated apparent diffusion coefficient in normal-appearing brain tissue after  
45  
46 treatment. *Radiology* 2007;242:518-25.
- 47  
48 37. Jang SH. Somatotopic arrangement and location of the corticospinal tract in the  
49  
50  
51  
52  
53  
54  
55

60

1  
2  
3  
4 brainstem of the human brain. *Yonsei Med J* 2011;52:553-7.  
5

6 38. Yamada K, Sakai K, Akazawa K, *et al.* MR tractography: a review of its clinical  
7 applications. *Magn Reson Med Sci* 2009;8:165-74.  
8

9  
10 39. Lee SK, Kim DI, Kim J, *et al.* Diffusion-tensor MR imaging and fiber tractography: a  
11 new method of describing aberrant fiber connections in developmental CNS  
12 anomalies. *Radiographics* 2005;25:53-65; discussion 6-8.  
13  
14  
15  
16  
17  
18  
19  
20  
21  
22  
23  
24  
25  
26  
27  
28  
29  
30  
31  
32  
33  
34  
35  
36  
37  
38  
39  
40  
41  
42  
43  
44  
45  
46  
47  
48  
49  
50  
51  
52  
53  
54  
55  
56  
57  
58  
59  
60

**Table 1.** Demographic data for the patient and control groups.

|                                          | Patient group ( <i>n</i> =16) | Control group ( <i>n</i> =15) |
|------------------------------------------|-------------------------------|-------------------------------|
| Age (year)                               | 51.6±13.3                     | 48.1±15.1                     |
| Sex, male/female                         | 9 / 7                         | 7 / 8                         |
| Duration from onset (weeks)              | 5.7 ± 1.5                     |                               |
| Modified Fisher grade                    | 2.5 ± 0.9                     |                               |
| WFNS                                     | 2.1 ± 1.3                     |                               |
| Hijdra score                             | 15.7 ± 6.3                    |                               |
| Ruptured artery<br>(ACoA:ACA:MCA:PCA)    | 11:1:3:1                      |                               |
| Operation type<br>(clipping:coiling:non) | 12:2:2                        |                               |
| MMSE                                     | 19.8±8.8                      |                               |

WFNS: World Federation of Neurosurgical Societies, ACoA: anterior communicating, ACA: anterior cerebral artery, MCA: middle cerebral artery, PCA: posterior communicating artery, MMSE: Mini-mental state examination

**Table 2.** Results of diffusion tensor tractography parameters of the mammillothalamic tract in the patient and control groups.

|               | Hemisphere | FA                | <i>p</i> | Tract volume         | <i>p</i> |
|---------------|------------|-------------------|----------|----------------------|----------|
| Patient group | Right      | 0.36 (0.04, 0.36) |          | 69.08 (30.33, 72.00) |          |
|               | Left       | 0.35 (0.04, 0.36) |          | 78.86 (28.80, 80.50) |          |
|               | Both       | 0.36 (0.04, 0.36) | .015*    | 74.15 (23.39, 74.00) | .000*    |
| Control group | Right      | 0.38 (0.04, 0.38) |          | 96.80 (22.7, 96.00)  |          |
|               | Left       | 0.37 (0.03, 0.38) |          | 99.73 (23.8, 103.00) |          |
|               | Both       | 0.38 (0.03, 0.38) |          | 98.27 (22.9, 98.50)  |          |

Values represent mean ( $\pm$ standard deviation, median value), FA: fractional anisotropy, *p*: An independent t-test for determination of variances in FA and tract volume between the patient and control groups.

\* *p* < .05



1  
2  
3  
4 **Figure legend**  
5  
6

7 **Fig 1.** Diffusion tensor tractography (DTT) for the mammillothalamic tract (MTT). Brain CT  
8 shows subarachnoid hemorrhage and the MTTs in both hemispheres of a patient (34-year old  
9 male) are reconstructed between the mammillary body and the anterior thalamus. However,  
10 the right MTT (red) of the patient is thinned, compared with the left MTT (green) of the  
11 patients and normal control subjects.  
12  
13  
14  
15  
16  
17

18  
19 **Fig. 2.** The incidence of injury of the mammillothalamic tract  
20

21  
22 (FA: fractional anisotropy, MTT: mammillothalamic tract, TV: tract volume)  
23  
24  
25  
26  
27  
28  
29  
30  
31  
32  
33  
34  
35  
36  
37  
38  
39  
40  
41  
42  
43  
44  
45  
46  
47  
48  
49  
50  
51  
52  
53  
54  
55  
56  
57  
58  
59  
60

1  
2  
3  
4 **Title: Injury of the mammillothalamic tract in patients with subarachnoid hemorrhage:**  
5 **a retrospective diffusion tensor imaging study**  
6  
7

8 **Running title: Injury of the mammillothalamic tract**  
9  
10

11  
12  
13 Author 1: Sung Ho Jang, MD

14 Department of Physical Medicine and Rehabilitation, College of Medicine, Yeungnam  
15 University  
16

17 e-mail: strokerehab@hanmail.net  
18  
19

20  
21 Author 2 : Byung Yeon Choi, MD

22 Department of Neurosurgery, College of Medicine, Yeungnam University  
23

24 e-mail: bychoi@med.yu.ac.kr  
25  
26

27  
28 Author 3 : Seong Ho Kim, MD

29 Department of Neurosurgery, College of Medicine, Yeungnam University  
30

31 e-mail: shkim@medical.yeungnam.ac.kr  
32  
33

34  
35 Author 4 : Chul Hoon Chang, MD

36 Department of Neurosurgery, College of Medicine, Yeungnam University  
37

38 e-mail: cch0102@yumail.ac.kr  
39  
40

41  
42 Author 5: Young Jin Jung, MD

43 Department of Neurosurgery, College of Medicine, Yeungnam University  
44

45 e-mail: sofesofe@hanmail.net  
46  
47

48 Author 6 (Corresponding author): Hyeok Gyu Kwon, MS

49 Department of Physical Medicine and Rehabilitation, College of Medicine, Yeungnam  
50 University  
51  
52

1  
2  
3  
4 Mailing Address: Department of Physical Medicine and Rehabilitation, College of Medicine,  
5 Yeungnam University 317-1, Daemyung dong, Namku, Daegu, 705-717, Republic of Korea  
6  
7 Tel: 82-53-620-4098      FAX: 82-53-625-3508      e-mail: khg0715@hanmail.net  
8  
9  
10  
11  
12  
13  
14  
15  
16  
17  
18  
19  
20  
21  
22  
23  
24  
25  
26  
27  
28  
29  
30  
31  
32  
33  
34  
35  
36  
37  
38  
39  
40  
41  
42  
43  
44  
45  
46  
47  
48  
49  
50  
51  
52  
53  
54  
55  
56  
57  
58  
59  
60

For peer review only

**Abstract**

**Objective:** Few studies have reported on injury of the mammillothalamic tract (MTT) in stroke patients. However, no study in patients with subarachnoid hemorrhage (SAH) has been reported. Using diffusion tensor tractography (DTT), we attempted to investigate injury of the MTT in patients with subarachnoid hemorrhage.

**Methods:** We recruited 16 patients with SAH and 15 control subjects. Diffusion tensor imaging (DTI) was obtained at  $5.7 \pm 1.5$  weeks after onset and reconstruction of the MTT was performed using the probabilistic tractography method. The fractional anisotropy (FA) value and tract number of the MTT and the Mini-Mental State Examination (MMSE) score were determined. Values of FA and tract volume showing decrement of more than two standard deviations that of normal control were defined as abnormal.

**Results:** The FA value and tract volume in the patient group were significantly lower than those of the control group ( $p < .05$ ). In addition, MMSE showed strong ( $r = 0.67$ ,  $p = 0.005$ ) positive correlation with tract volume without correlation with FA. In the individual analysis, 16 MTTs of 32 MTTs in 16 patients showed abnormalities of the MTT in terms of the FA value, the tract volume, or the presence of a reconstructed MTT. As a result, ten (62.5%) of 16 patients showed abnormality of the MTT in at least one hemisphere.

**Conclusion:** We found that patients with SAH showed injury of the MTT and this injury showed correlation with cognitive dysfunction. ~~Our results suggest that evaluation of the MTT using DTI would be necessary for patients with cognitive dysfunction following SAH.~~

**Keywords:** Mammillothalamic tract, Subarachnoid hemorrhage, Diffusion tensor tractography

### Strengths and limitations of this study

- This is the first study on the injury of the mammillothalamic tract (MTT) in patients with subarachnoid hemorrhage (SAH) using diffusion tensor imaging (DTI).
- The main strength of our study is to find the relation between MTT injury and cognitive function with SAH
- Limitation of our study is that fiber tracking of the MTT might be affected by artifact, such as an aneurysmal clip. Therefore, conduct of further studies to overcome this limitation would be necessary.

## Introduction

The mammillothalamic tract (MTT) connects the mammillary body and the anterior thalamus as a part of the Papez circuit.<sup>1</sup> Because of the anatomical characteristics of the MTT, thin, short, and located deep within the brain, accurate estimation of the MTT has been difficult in the live human brain. However, diffusion tensor tractography (DTT), which is derived from diffusion tensor imaging (DTI), allows for reconstruction of the MTT in the human brain.<sup>2</sup> Therefore, accurate estimation of the MTT in terms of DTI parameters and three-dimensional configuration is now possible.<sup>2</sup> A few studies have reported on injury of the MTT in thalamic hemorrhage and thalamic infarct, however, so far, little is known about injury of the MTT.<sup>3 4</sup>

Subarachnoid hemorrhage (SAH) is extravasation of blood into the subarachnoid space accompanied by various neurological sequelae in terms of memory, executive function, language, motor function, and cranial nerve function.<sup>5-16</sup> In particular, memory deficit is known to be one of the most common sequelae of SAH.<sup>7 8 10 11 14</sup> In the past, previous studies have suggested that the neurotoxic effects of blood, vasospasm, or increased intracranial pressure are pathogenic mechanisms of neural sequelae following SAH.<sup>5 7 17-23</sup> After introduction of DTI, among the neural tracts associated with memory, injuries in the fornix and cingulum were reported in patients with SAH.<sup>24</sup> However, no study on neural injury of the MTT in patients with SAH has been reported.

In the current study, using DTT, we attempted to investigate injury of the MTT in patients with SAH.

## Methods

### Subjects

We recruited 16 patients with SAH (male: 9, female: 7, mean age: 51.6±13.3 years, range: 34~70 years) and 15 normal healthy control subjects (male: 7, female: 8, mean age: 48.1±15.1 years, range: 20~67 years) with no previous history of neurological, physical, or psychiatric illness for this study. Inclusion criteria for patients were as follows: (1) first ever stroke, (2) age 30~70 years, (3) hemorrhage in the subarachnoid space due to aneurismal rupture confirmed by a neuroradiologist, (4) DTI was scanned at a chronic stage (~~between 4~8 weeks~~) after onset, and (5) no hydrocephalus, intracerebral hemorrhage, or intraventricular hemorrhage. Severity of SAH was assessed according to the modified Fisher CT grade, World Federation of Neurosurgical Societies (WFNS) and Hijdra score.<sup>25-27</sup> Patients who showed any lesion or artifact due to the clipping or coiling along or around the MTT pathway between the mammillary body and thalamus were excluded. This study was conducted retrospectively and the study protocol was approved by the Institutional Review Board of a university hospital.

---

Figure 1

---

### Clinical evaluation

Cognitive function was evaluated at the time of DTI scanning. The mini-mental state examination (MMSE) was used for assessment of cognitive impairment. The reliability and validity of the MMSE have been well established.<sup>28,26</sup>

## Diffusion tensor tractography

A 6-channel head coil on a 1.5 T Philips Gyroscan Intera (Philips, Ltd, Best, The Netherlands) with single-shot echo-planar imaging was used for acquisition of DTI data. For each of the 32 non-collinear diffusion sensitizing gradients, we acquired 67 contiguous slices parallel to the anterior commissure-posterior commissure line. Imaging parameters were as follows: acquisition matrix =  $96 \times 96$ ; reconstructed to matrix =  $128 \times 128$ ; field of view =  $221 \times 221 \text{ mm}^2$ ; TR = 10,726 ms; TE = 76 ms; parallel imaging reduction factor (SENSE factor) = 2; EPI factor = 49;  $b = 1000 \text{ s/mm}^2$ ; NEX = 1; and a slice thickness of 2.3 mm (acquired voxel size  $1.73 \times 1.73 \times 2.3 \text{ mm}^3$ ). Affine multi-scale two-dimensional registration using the Oxford Centre for Functional Magnetic Resonance Imaging of Brain (FMRIB) Software Library (FSL; [www.fmrib.ox.ac.uk/fsl](http://www.fmrib.ox.ac.uk/fsl)) was used for removal of eddy current-induced image distortions.<sup>29,27</sup> Fiber tracking was performed using a probabilistic tractography method based on a multi-fiber model, and applied in the current study utilizing tractography routines implemented in FMRIB Diffusion (5000 streamline samples, 0.5 mm step lengths, curvature thresholds = 0.2).<sup>29-31,27-29</sup> MTTs were determined by selection of fibers passing through three regions of interest (ROIs). Seed ROIs were placed on the mammillary body on the axial image.<sup>2</sup> Two target ROIs were drawn at the portion of the MTT area (between the portion of the fornix and the red nucleus in the anteroposterior direction) at about the bicommissural level and the portion of the anterior thalamus on the axial image.<sup>2</sup> Of 5000 samples generated from each seed voxel, results for each contact were the visualized threshold point at 5 streamline through each voxel for analysis. Values of fractional anisotropy (FA) and tract volume which was determined by counting the voxels of MTT were measured using MATLAB<sup>TM</sup> (Matlab R2007b, The Mathworks, Natick, MA,



1  
2  
3  
4 | USA). Values of FA and tract volume showing decrement of more than two standard  
5  
6 deviations that of normal control were defined as abnormal.  
7  
8

### 9 **Statistical analysis**

10  
11  
12 We used SPSS software (v.15.0; SPSS, Chicago, IL) for data analysis. Data on MTTs  
13 that were not reconstructed were excluded in statistical analysis. An independent t-test was  
14 used for determination of variances in the value of FA and tract volume between the patient  
15 and control group. Subsequently, using Pearson correlation, DTT parameters for FA and tract  
16 volume of the patient group were used in determination of correlation with MMSE.<sup>3230</sup> The  
17 significant level of the *p* value was set at 0.05.  
18  
19  
20  
21  
22  
23  
24  
25  
26  
27  
28  
29  
30  
31  
32  
33  
34  
35  
36  
37  
38  
39  
40  
41  
42  
43  
44  
45  
46  
47  
48  
49  
50  
51  
52  
53  
54  
55  
56  
57  
58  
59  
60

## Results

A summary of the demographic data for the patient and control groups is shown in Table 1. The artery distribution of aneurismal rupture for SAH in 16 patients was as follows: the anterior communicating artery: 11 patients (68.8%), the middle cerebral artery: three patients (18.8%), the posterior communicating artery: one patient (6.2%), and the anterior cerebral artery: one patient (6.2%). In addition, 12 patients (75%) patients underwent aneurysmal clipping and two patients underwent endovascular coiling (12.5%). The two remaining patients (12.5%) received conservative treatment. Average MMSE was  $19.8 \pm 8.8$ . Average modified Fisher CT grade, WFNS, and Hijdra score were  $3.4 \pm 0.5$ ,  $2.5 \pm 0.9$ ,  $2.1 \pm 1.3$ , and  $15.7 \pm 6.3$ , respectively.<sup>25-28</sup> DTI scanning was performed at  $5.7 \pm 1.5$  weeks (range: 4~8 weeks) after SAH onset.

---

Table 1

---

A summary of the results of DTT parameters for MTT in the patient and control groups is shown in Table 2. Values for FA and tract volume were significantly lower in the patient group than in the control group, respectively ( $p < .05$ ). The tract volume of the MTT showed strong ( $r = 0.67$ ,  $p = 0.005$ ) positive correlation with MMSE, however, no correlation was observed between the FA value of MTT and MMSE ( $r = 0.41$ ,  $p = 0.11$ ).<sup>32 30</sup>

---

Table 2

---

Figure 2 shows the results for incidence of injury of the MTT with DTT parameters. Among 32 hemispheres of 16 patients, the MTT was not reconstructed in five hemispheres of four patients (right hemisphere: two, left hemisphere: one, both hemispheres: one); in contrast,

1  
2  
3  
4 the MTTs were reconstructed in all 30 hemispheres of 15 control subjects. With regard to the  
5  
6 FA and tract volume, nine MTTs in six patients (right hemisphere: one, left hemisphere: two,  
7  
8 both hemispheres: three) and 13 MTTs in nine patients (right hemisphere: four, left  
9  
10 hemisphere: one, both hemispheres: four) of 32 hemispheres in 16 patients revealed a  
11  
12 decrement of more than two standard deviations, compared with control subjects. Six MTTs  
13  
14 in five patients (right hemisphere: three, left hemisphere: one, both hemispheres: one) showed  
15  
16 a decrement of more than two standard deviations in both FA and tract volume. As a result,  
17  
18 16 MTTs (right hemisphere: two, left hemisphere: two, both hemispheres: six) of 32 MTTs in  
19  
20 16 patients showed abnormalities of the MTT. Three patients in one hemisphere and one  
21  
22 patient in both hemispheres whose MTT was not reconstructed belonged to these 16 patients.  
23  
24 Consequently, in the individual analysis, the prevalence of MTT abnormality was 62.5% (10  
25  
26 of 16 patients).  
27  
28  
29  
30

---

31  
32 Fig 2  
33  
34  
35  
36  
37  
38  
39  
40  
41  
42  
43  
44  
45  
46  
47  
48  
49  
50  
51  
52  
53  
54  
55  
56  
57  
58  
59  
60

---

## Discussion

In the current study, we investigated injury of the MTT in patients with SAH using DTT. We obtained the following results: 1) the FA value and tract volume in the patient group were significantly lower than those of the control group, 2) MMSE showed strong ( $r=0.67$ ,  $p=0.005$ ) positive correlation with tract volume without correlation with FA value, 3) in the individual analysis, 16 MTTs of 32 MTTs in 16 patients showed abnormalities of the MTT in terms of the FA value, tract volume, or the presence of a reconstructed MTT. As a result, ten (62.5%) of 16 patients showed abnormality of the MTT in at least one hemisphere. The FA value indicates the degree of directionality of water diffusion and has a range of zero (completely isotropic diffusion) to one (completely anisotropic diffusion). It represents the white matter organization: in detail, the degree of directionality and integrity of white matter microstructures such as axons, myelin, and microtubules.<sup>3334</sup> In contrast, tract volume, the number of voxels in a neural tract, reflects the neural fibers contained within a neural tract.<sup>3432</sup> Therefore, a decrease in the FA or tract volume indicates an injury of the neural tract. Consequently, our results showing that the FA value and tract volume in the patient group were significantly lower than those of the control group indicate injury of the MTT in the patient group. Regarding the relation between MTT injury and cognition, MMSE showed strong positive correlation with the tract volume of the MTT without correlation with FA.<sup>3230</sup> These results appear to indicate that the tract volume is more sensitive than the FA value for detection of injury of the MTT. The MMSE is the most widely used tool for screening cognitive dysfunction.<sup>3533</sup> Because this study was conducted retrospectively, we could not employ detailed neuropsychological testing for evaluation of the function of the MTT. Therefore, conduct of further prospective studies, including specific neurophysiological tests

1  
2  
3  
4 for MTT function should be encouraged.  
5  
6

7 The pathogenic mechanism of neural injury following SAH has not been elucidated and  
8  
9 few DTI studies have reported on this mechanism.<sup>15 3634</sup> In 2007, Liu et al. demonstrated that  
10  
11 SAH caused global mild vasogenic edema in white matter and deep gray matter by measuring  
12  
13 the apparent diffusion coefficient value in the subacute stage of SAH, which was  
14  
15 undetectable on T2-weighted and diffusion-weighted MR images.<sup>3634</sup> In a recent study, Yeo et  
16  
17 al. [2012] reported injury of the CST at the midbrain in patients with SAH.<sup>15</sup> This study  
18  
19 suggested that frequent occurrence of SAH into perimesencephalic cisterns could be ascribed  
20  
21 to injury of the CST, through mechanical (increased intracranial pressure or direct mass) or  
22  
23 chemical mechanisms (a blood clot itself can cause extensive damage).<sup>5 23 3735</sup> Considering  
24  
25 that the MTT is located in close proximity to a cistern, the MTT in patients with SAH appears  
26  
27 to be injured by mechanisms similar to those of CST injury at the midbrain.<sup>5 15 17 18 23</sup>  
28  
29  
30  
31

32 As for injury of the MTT, to the best of our knowledge, one study was reported in  
33 patients with thalamic hemorrhage.<sup>3</sup> Therefore, this is the first DTI study on injury of the  
34 MTT in patients with SAH. However, several limitations of DTI should be considered.<sup>38 39</sup>  
35  
36 First, DTI is a powerful anatomic imaging tool that can demonstrate gross fiber architecture;  
37 however, reflection of all fibers, particularly small fibers, can be difficult. Second, fiber  
38 tracking of the MTT might be affected by artifact, such as an aneurysmal clip. Third, we  
39 investigated only injury of the MTT following SAH even though other tracts such as fornix,  
40 cingulum, thalamocortical tract of Papez circuit might be also injured. Therefore, conduct of  
41 further studies to overcome these limitations would be necessary.  
42  
43  
44  
45  
46  
47  
48  
49  
50  
51  
52

53 In conclusion, we found injury of the MTT in the patient group, compared with the  
54  
55

1  
2  
3  
4 control group. In addition, in the individual analysis, 16 MTTs (50%) of 32 hemispheres  
5  
6 showed injury of the MTT and ten (62.5%) of 16 patients showed injury of the MTT in at  
7  
8 least in one hemisphere in terms of DTT parameters or the presence of a reconstructed MTT.  
9

10  
11 ~~As for injury of the MTT, to the best of our knowledge, one study was reported in patients~~  
12 ~~with thalamic hemorrhage.<sup>3</sup> Therefore, this is the first DTT study on injury of the MTT in~~  
13 ~~patients with SAH. However, several limitations of DTI should be considered.<sup>36,37</sup> First, DTI~~  
14 ~~is a powerful anatomic imaging tool that can demonstrate gross fiber architecture; however,~~  
15 ~~reflection of all fibers, particularly small fibers, can be difficult. Second, fiber tracking of the~~  
16 ~~MTT might be affected by artifact, such as an aneurysmal clip. Therefore, conduct of further~~  
17 ~~studies to overcome these limitations would be necessary.~~  
18  
19  
20  
21  
22  
23  
24  
25  
26  
27  
28  
29  
30  
31  
32  
33  
34  
35  
36  
37  
38  
39  
40  
41  
42  
43  
44  
45  
46  
47  
48  
49  
50  
51  
52  
53  
54  
55  
56  
57  
58  
59  
60

**Acknowledgement**

This research was supported by Basic Science Research Program through the National Research Foundation of Korea(NRF) funded by the Ministry of Education, Science and Technology(2012R1A1A4A01001873).

**Contributorship statement**

Sung Ho Jang: Conceiving and designing the study, funding, data acquisition, manuscript development and manuscript writing. Byung Yeon Choi: Acquisition and analysis of data, Seong Ho Kim: Research design and data acquisition. Chul Hoon Chang: Research design and data acquisition. Young Jin Jung: Research design and technical support. Hyeok Gyu Kwon: Manuscript development, data acquisition, manuscript writing and manuscript authorization.

**Competing interests**

None

**Funding**

This research was supported by Basic Science Research Program through the National Research Foundation of Korea(NRF) funded by the Ministry of Education, Science and Technology(2012R1A1A4A01001873).

**Data sharing statement**

No additional data are available.

**Ethics approval**

This study protocol was approved by the Institutional Review Board of the Yeungnam university hospital.

## References

1. Aggleton JP, Brown MW. Episodic memory, amnesia, and the hippocampal-anterior thalamic axis. *Behav Brain Sci* 1999;22:425-44; discussion 44-89.
2. Kwon HG, Hong JH, Jang SH. Mammillothalamic tract in human brain: diffusion tensor tractography study. *Neurosci Lett* 2010;481:51-3.
3. Jang SH, Lee HD, Kwon HG. Injury of the mammillothalamic tract in patients with thalamic hemorrhage. *Front Hum Neurosci* 2014;8:259.
4. Jang SH, Jun L, Kwon HG. Mystery Case: Injuries of neural tracts in the Papez circuit following anterior thalamic infarction. *Neurology* 2014;82:e178-9.
5. van Gijn J, van Dongen KJ, Vermeulen M, *et al.* Perimesencephalic hemorrhage: a nonaneurysmal and benign form of subarachnoid hemorrhage. *Neurology* 1985;35:493-7.
6. Ferrante L, Acqui M, Mastronardi L, *et al.* Posterior inferior cerebellar artery (PICA) aneurysm presenting with SAH and contralateral crural monoparesis: a case report. *Surg Neurol* 1992;38:43-5.
7. Ogden JA, Mee EW, Henning M. A prospective study of impairment of cognition and memory and recovery after subarachnoid hemorrhage. *Neurosurgery* 1993;33:572-86; discussion 86-7.
8. Ostbye T, Levy AR, Mayo NE. Hospitalization and case-fatality rates for subarachnoid hemorrhage in Canada from 1982 through 1991. The Canadian Collaborative Study Group of Stroke Hospitalizations. *Stroke* 1997;28:793-8.
9. Powell J, Kitchen N, Heslin J, *et al.* Psychosocial outcomes at three and nine months after good neurological recovery from aneurysmal subarachnoid haemorrhage:



- 1  
2  
3  
4 predictors and prognosis. *J Neurol Neurosurg Psychiatry* 2002;72:772-81.
- 5  
6 10. Kreiter KT, Copeland D, Bernardini GL, *et al.* Predictors of cognitive dysfunction  
7  
8 after subarachnoid hemorrhage. *Stroke* 2002;33:200-8.
- 9  
10  
11 11. Mayer SA, Kreiter KT, Copeland D, *et al.* Global and domain-specific cognitive  
12  
13 impairment and outcome after subarachnoid hemorrhage. *Neurology* 2002;59:1750-8.
- 14  
15  
16 12. Orbo M, Waterloo K, Egge A, *et al.* Predictors for cognitive impairment one year after  
17  
18 surgery for aneurysmal subarachnoid hemorrhage. *J Neurol* 2008;255:1770-6.
- 19  
20  
21 13. Wong GK, Wong R, Mok VC, *et al.* Clinical study on cognitive dysfunction after  
22  
23 spontaneous subarachnoid haemorrhage: patient profiles and relationship to  
24  
25 cholinergic dysfunction. *Acta Neurochir (Wien)* 2009;151:1601-7.
- 26  
27  
28 14. Al-Khindi T, Macdonald RL, Schweizer TA. Cognitive and functional outcome after  
29  
30 aneurysmal subarachnoid hemorrhage. *Stroke* 2010;41:e519-36.
- 31  
32  
33 15. Yeo SS, Choi BY, Chang CH, *et al.* Evidence of corticospinal tract injury at midbrain  
34  
35 in patients with subarachnoid hemorrhage. *Stroke* 2012;43:2239-41.
- 36  
37  
38 16. Sheldon S, Macdonald RL, Schweizer TA. Free recall memory performance after  
39  
40 aneurysmal subarachnoid hemorrhage. *J Int Neuropsychol Soc* 2012;18:334-42.
- 41  
42  
43 17. Smith B. Cerebral Pathology in Subarachnoid Haemorrhage. *J Neurol Neurosurg*  
44  
45 *Psychiatry* 1963;26:535-9.
- 46  
47  
48 18. Grote E, Hassler W. The critical first minutes after subarachnoid hemorrhage.  
49  
50 *Neurosurgery* 1988;22:654-61.
- 51  
52  
53 19. Hardemark HG, Almqvist O, Johansson T, *et al.* S-100 protein in cerebrospinal fluid  
54  
55 after aneurysmal subarachnoid haemorrhage: relation to functional outcome, late CT  
56  
57 and SPECT changes, and signs of higher cortical dysfunction. *Acta Neurochir (Wien)*  
58  
59  
60

- 1  
2  
3  
4 1989;99:135-44.  
5  
6 20. Jackowski A, Crockard A, Burnstock G, *et al.* The time course of intracranial  
7 pathophysiological changes following experimental subarachnoid haemorrhage in the  
8 rat. *J Cereb Blood Flow Metab* 1990;10:835-49.  
9  
10 21. Germano AF, Dixon CE, d'Avella D, *et al.* Behavioral deficits following experimental  
11 subarachnoid hemorrhage in the rat. *J Neurotrauma* 1994;11:345-53.  
12  
13 22. Germano A, Caruso G, Caffo M, *et al.* Does subarachnoid blood extravasation per se  
14 induce long-term neuropsychological and cognitive alterations? *Acta Neurochir*  
15 *(Wien)* 1998;140:805-11; discussion 11-2.  
16  
17 23. Chua CO, Chahboune H, Braun A, *et al.* Consequences of intraventricular  
18 hemorrhage in a rabbit pup model. *Stroke* 2009;40:3369-77.  
19  
20 24. Hong JH, Choi BY, Chang CH, *et al.* Injuries of the cingulum and fornix after rupture  
21 of an anterior communicating artery aneurysm: a diffusion tensor tractography study.  
22 *Neurosurgery* 2012;70:819-23.  
23  
24 ~~25. Fisher CM, Kistler JP, Davis JM. Relation of cerebral vasospasm to subarachnoid~~  
25 ~~hemorrhage visualized by computerized tomographic scanning. *Neurosurgery*~~  
26 ~~1980;6:1-9.~~  
27  
28 25. Teasdale GM, Drake CG, Hunt W, *et al.* A universal subarachnoid hemorrhage scale:  
29 report of a committee of the World Federation of Neurosurgical Societies. *J Neurol*  
30 *Neurosurg Psychiatry* 1988;51:1457.  
31  
32 26. Hijdra A, Brouwers PJ, Vermeulen M, *et al.* Grading the amount of blood on  
33 computed tomograms after subarachnoid hemorrhage. *Stroke* 1990;21:1156-61.  
34  
35 27. Frontera JA, Claassen J, Schmidt JM, *et al.* Prediction of symptomatic vasospasm  
36  
37  
38  
39  
40  
41  
42  
43  
44  
45  
46  
47  
48  
49  
50  
51  
52  
53  
54

- 1  
2  
3  
4  
5  
6  
7  
8  
9  
10  
11  
12  
13  
14  
15  
16  
17  
18  
19  
20  
21  
22  
23  
24  
25  
26  
27  
28  
29  
30  
31  
32  
33  
34  
35  
36  
37  
38  
39  
40  
41  
42  
43  
44  
45  
46  
47  
48  
49  
50  
51  
52  
53  
54  
55  
56  
57  
58  
59  
60
- [after subarachnoid hemorrhage: the modified fisher scale. \*Neurosurgery\* 2006;59:21-7; discussion -7.](#)
268. Dick JP, Guiloff RJ, Stewart A, *et al.* Mini-mental state examination in neurological patients. *J Neurol Neurosurg Psychiatry* 1984;47:496-9.
279. Smith SM, Jenkinson M, Woolrich MW, *et al.* Advances in functional and structural MR image analysis and implementation as FSL. *Neuroimage* 2004;23 Suppl 1:S208-19.
2830. Behrens TE, Johansen-Berg H, Woolrich MW, *et al.* Non-invasive mapping of connections between human thalamus and cortex using diffusion imaging. *Nat Neurosci* 2003;6:750-7.
2931. Behrens TE, Berg HJ, Jbabdi S, *et al.* Probabilistic diffusion tractography with multiple fibre orientations: What can we gain? *Neuroimage* 2007;34:144-55.
302. Rea LM, Parker RA: Designing and conducting survey research : a comprehensive guide, ed 3rd. San Francisco: Jossey-Bass; 2005.
313. Assaf Y, Pasternak O. Diffusion tensor imaging (DTI)-based white matter mapping in brain research: a review. *J Mol Neurosci* 2008;34:51-61.
324. Kwak SY, Yeo SS, Choi BY, *et al.* Corticospinal tract change in the unaffected hemisphere at the early stage of intracerebral hemorrhage: a diffusion tensor tractography study. *Eur Neurol* 2010;63:149-53.
335. Folstein MF, Folstein SE, McHugh PR. "Mini-mental state". A practical method for grading the cognitive state of patients for the clinician. *J Psychiatr Res* 1975;12:189-98.
346. Liu Y, Soppi V, Mustonen T, *et al.* Subarachnoid hemorrhage in the subacute stage:

1  
2  
3  
4 elevated apparent diffusion coefficient in normal-appearing brain tissue after  
5  
6 treatment. *Radiology* 2007;242:518-25.  
7

8 | 357. Jang SH. Somatotopic arrangement and location of the corticospinal tract in the  
9  
10 brainstem of the human brain. *Yonsei Med J* 2011;52:553-7.  
11

12 | 368. Yamada K, Sakai K, Akazawa K, *et al.* MR tractography: a review of its clinical  
13  
14 applications. *Magn Reson Med Sci* 2009;8:165-74.  
15

16 | 379. Lee SK, Kim DI, Kim J, *et al.* Diffusion-tensor MR imaging and fiber tractography: a  
17  
18 new method of describing aberrant fiber connections in developmental CNS  
19  
20 anomalies. *Radiographics* 2005;25:53-65; discussion 6-8.  
21  
22  
23  
24  
25  
26  
27  
28  
29  
30  
31  
32  
33  
34  
35  
36  
37  
38  
39  
40  
41  
42  
43  
44  
45  
46  
47  
48  
49  
50  
51  
52  
53  
54  
55  
56  
57  
58  
59  
60

1  
2  
3  
4 **Figure legend**  
5  
6

7 **Fig 1.** Diffusion tensor tractography (DTT) for the mammillothalamic tract (MTT). Brain CT  
8 shows subarachnoid hemorrhage and the MTTs in both hemispheres of a patient (34-year old  
9 male) are reconstructed between the mammillary body and the anterior thalamus. However,  
10 the right MTT (red) of the patient is thinned, compared with the left MTT (green) of the  
11 patients and normal control subjects.  
12  
13  
14  
15  
16  
17  
18  
19  
20  
21  
22  
23  
24  
25  
26  
27  
28  
29  
30  
31  
32  
33  
34  
35  
36  
37  
38  
39  
40  
41  
42  
43  
44  
45  
46  
47  
48  
49  
50  
51  
52  
53  
54  
55  
56  
57  
58  
59  
60

1  
2  
3  
4  
5  
6  
7  
8  
9  
10  
11  
12  
13  
14  
15  
16  
17  
18  
19  
20  
21  
22  
23  
24  
25  
26  
27  
28  
29  
30  
31  
32  
33  
34  
35  
36  
37  
38  
39  
40  
41  
42  
43  
44  
45  
46  
47  
48  
49  
50  
51  
52  
53  
54  
55  
56  
57  
58  
59  
60

**Fig. 2.** The incidence of injury of the mammillothalamic tract

(FA: fractional anisotropy, MTT: mammillothalamic tract, TV: tract volume)

For peer review only

**Table 1.** Demographic data for the patient and control groups.

|                                                                                                                                                                                                                                                                  | Patient group (n=16) | Control group (n=15) |
|------------------------------------------------------------------------------------------------------------------------------------------------------------------------------------------------------------------------------------------------------------------|----------------------|----------------------|
| Age (year)                                                                                                                                                                                                                                                       | 51.6±13.3            | 48.1±15.1            |
| Sex, male/female                                                                                                                                                                                                                                                 | 9 / 7                | 7 / 8                |
| Duration from onset (weeks)                                                                                                                                                                                                                                      | 5.7 ± 1.5            |                      |
| <u>Modified Fisher's grading</u>                                                                                                                                                                                                                                 | <u>3.4±0.5</u>       | <u>2.5 ± 0.9</u>     |
| <u>WFNS</u>                                                                                                                                                                                                                                                      | <u>2.1 ± 1.3</u>     |                      |
| <u>Hijdra score</u>                                                                                                                                                                                                                                              | <u>15.7 ± 6.3</u>    |                      |
| Ruptured artery<br>(ACoA:ACA:MCA:PCA)                                                                                                                                                                                                                            | 11:1:3:1             |                      |
| Operation type<br>(clipping:coiling:non)                                                                                                                                                                                                                         | 12:2:2               |                      |
| MMSE                                                                                                                                                                                                                                                             | 19.8±8.8             |                      |
| <u>SAH: subarachnoid hemorrhage, WFNS: World Federation of Neurosurgical Societies,</u><br>ACoA: anterior communicating, ACA: anterior cerebral artery, MCA: middle cerebral artery,<br>PCA: posterior communicating artery, MMSE: Mini-mental state examination |                      |                      |

**Table 2.** Results of diffusion tensor tractography parameters of the mammillothalamic tract in the patient and control groups.

|               | Hemisphere | FA                        | <i>p</i> | Tract volume                 | <i>p</i> |
|---------------|------------|---------------------------|----------|------------------------------|----------|
| Patient group | Right      | 0.36 (0.04, <u>0.36</u> ) |          | 69.08 (30.33, <u>72.00</u> ) |          |
|               | Left       | 0.35 (0.04, <u>0.36</u> ) |          | 78.86 (28.80, <u>80.50</u> ) |          |
|               | Both       | 0.36 (0.04, <u>0.36</u> ) | .015*    | 74.15 (23.39, <u>74.00</u> ) | .000*    |
| Control group | Right      | 0.38 (0.04, <u>0.38</u> ) |          | 96.80 (22.7, <u>96.00</u> )  |          |
|               | Left       | 0.37 (0.03, <u>0.38</u> ) |          | 99.73 (23.8, <u>103.00</u> ) |          |
|               | Both       | 0.38 (0.03, <u>0.38</u> ) |          | 98.27 (22.9, <u>98.50</u> )  |          |

Values represent mean ( $\pm$ standard deviation, median value), FA: fractional anisotropy, *p*: An independent t-test for determination of variances in FA and tract volume between the patient and control groups.

\* *p* < .05





Fig 1. Diffusion tensor tractography (DTT) for the mammillothalamic tract (MTT). Brain CT shows subarachnoid hemorrhage and the MTTs in both hemispheres of a patient (34-year old male) are reconstructed between the mammillary body and the anterior thalamus. However, the right MTT (red) of the patient is thinned, compared with the left MTT (green) of the patients and normal control subjects. 148x109mm (300 x 300 DPI)

1  
2  
3  
4  
5  
6  
7  
8  
9  
10  
11  
12  
13  
14  
15  
16  
17  
18  
19  
20  
21  
22  
23  
24  
25  
26  
27  
28  
29  
30  
31  
32  
33  
34  
35  
36  
37  
38  
39  
40  
41  
42  
43  
44  
45  
46  
47  
48  
49  
50  
51  
52  
53  
54  
55  
56  
57  
58  
59  
60



Fig. 2. The incidence of injury of the mammillothalamic tract (FA: fractional anisotropy, MTT: mammillothalamic tract, TV: tract volume)

216x109mm (300 x 300 DPI)

review only



## CONSORT 2010 checklist of information to include when reporting a randomised trial\*

| Section/Topic                    | Item No | Checklist item                                                                                                                                                                              | Reported on page No |
|----------------------------------|---------|---------------------------------------------------------------------------------------------------------------------------------------------------------------------------------------------|---------------------|
| <b>Title and abstract</b>        |         |                                                                                                                                                                                             |                     |
|                                  | 1a      | Identification as a randomised trial in the title                                                                                                                                           |                     |
|                                  | 1b      | Structured summary of trial design, methods, results, and conclusions (for specific guidance see CONSORT for abstracts)                                                                     | 4                   |
| <b>Introduction</b>              |         |                                                                                                                                                                                             |                     |
| Background and objectives        | 2a      | Scientific background and explanation of rationale                                                                                                                                          | 5                   |
|                                  | 2b      | Specific objectives or hypotheses                                                                                                                                                           | 5                   |
| <b>Methods</b>                   |         |                                                                                                                                                                                             |                     |
| Trial design                     | 3a      | Description of trial design (such as parallel, factorial) including allocation ratio                                                                                                        | 6                   |
|                                  | 3b      | Important changes to methods after trial commencement (such as eligibility criteria), with reasons                                                                                          | 6-7                 |
| Participants                     | 4a      | Eligibility criteria for participants                                                                                                                                                       | 6                   |
|                                  | 4b      | Settings and locations where the data were collected                                                                                                                                        |                     |
| Interventions                    | 5       | The interventions for each group with sufficient details to allow replication, including how and when they were actually administered                                                       |                     |
| Outcomes                         | 6a      | Completely defined pre-specified primary and secondary outcome measures, including how and when they were assessed                                                                          | 6-7                 |
|                                  | 6b      | Any changes to trial outcomes after the trial commenced, with reasons                                                                                                                       |                     |
| Sample size                      | 7a      | How sample size was determined                                                                                                                                                              | 6                   |
|                                  | 7b      | When applicable, explanation of any interim analyses and stopping guidelines                                                                                                                |                     |
| <b>Randomisation:</b>            |         |                                                                                                                                                                                             |                     |
| Sequence generation              | 8a      | Method used to generate the random allocation sequence                                                                                                                                      | 6                   |
|                                  | 8b      | Type of randomisation; details of any restriction (such as blocking and block size)                                                                                                         |                     |
| Allocation concealment mechanism | 9       | Mechanism used to implement the random allocation sequence (such as sequentially numbered containers), describing any steps taken to conceal the sequence until interventions were assigned |                     |
| Implementation                   | 10      | Who generated the random allocation sequence, who enrolled participants, and who assigned participants to interventions                                                                     | 6                   |
| Blinding                         | 11a     | If done, who was blinded after assignment to interventions (for example, participants, care providers, those                                                                                |                     |

|    |                          |                                                                                                                     |       |
|----|--------------------------|---------------------------------------------------------------------------------------------------------------------|-------|
| 1  |                          |                                                                                                                     |       |
| 2  |                          | assessing outcomes) and how                                                                                         |       |
| 3  |                          |                                                                                                                     |       |
| 4  |                          | 11b If relevant, description of the similarity of interventions                                                     |       |
| 5  | Statistical methods      | 12a Statistical methods used to compare groups for primary and secondary outcomes                                   | 6     |
| 6  |                          | 12b Methods for additional analyses, such as subgroup analyses and adjusted analyses                                | 6     |
| 7  |                          |                                                                                                                     |       |
| 8  | <b>Results</b>           |                                                                                                                     |       |
| 9  | Participant flow (a      | 13a For each group, the numbers of participants who were randomly assigned, received intended treatment, and        |       |
| 10 | diagram is strongly      | were analysed for the primary outcome                                                                               |       |
| 11 | recommended)             | 13b For each group, losses and exclusions after randomisation, together with reasons                                |       |
| 12 | Recruitment              | 14a Dates defining the periods of recruitment and follow-up                                                         |       |
| 13 |                          | 14b Why the trial ended or was stopped                                                                              |       |
| 14 |                          |                                                                                                                     |       |
| 15 | Baseline data            | 15 A table showing baseline demographic and clinical characteristics for each group                                 |       |
| 16 | Numbers analysed         | 16 For each group, number of participants (denominator) included in each analysis and whether the analysis was      |       |
| 17 |                          | by original assigned groups                                                                                         |       |
| 18 |                          |                                                                                                                     |       |
| 19 | Outcomes and             | 17a For each primary and secondary outcome, results for each group, and the estimated effect size and its           | 9-10  |
| 20 | estimation               | precision (such as 95% confidence interval)                                                                         |       |
| 21 |                          | 17b For binary outcomes, presentation of both absolute and relative effect sizes is recommended                     |       |
| 22 | Ancillary analyses       | 18 Results of any other analyses performed, including subgroup analyses and adjusted analyses, distinguishing       | 9-10  |
| 23 |                          | pre-specified from exploratory                                                                                      |       |
| 24 |                          |                                                                                                                     |       |
| 25 | Harms                    | 19 All important harms or unintended effects in each group (for specific guidance see CONSORT for harms)            |       |
| 26 |                          |                                                                                                                     |       |
| 27 | <b>Discussion</b>        |                                                                                                                     |       |
| 28 | Limitations              | 20 Trial limitations, addressing sources of potential bias, imprecision, and, if relevant, multiplicity of analyses | 12-13 |
| 29 | Generalisability         | 21 Generalisability (external validity, applicability) of the trial findings                                        |       |
| 30 | Interpretation           | 22 Interpretation consistent with results, balancing benefits and harms, and considering other relevant evidence    |       |
| 31 |                          |                                                                                                                     |       |
| 32 | <b>Other information</b> |                                                                                                                     |       |
| 33 | Registration             | 23 Registration number and name of trial registry                                                                   |       |
| 34 | Protocol                 | 24 Where the full trial protocol can be accessed, if available                                                      |       |
| 35 | Funding                  | 25 Sources of funding and other support (such as supply of drugs), role of funders                                  | 13    |
| 36 |                          |                                                                                                                     |       |

37

38 \*We strongly recommend reading this statement in conjunction with the CONSORT 2010 Explanation and Elaboration for important clarifications on all the items. If relevant, we also

39 recommend reading CONSORT extensions for cluster randomised trials, non-inferiority and equivalence trials, non-pharmacological treatments, herbal interventions, and pragmatic trials.

40 Additional extensions are forthcoming: for those and for up to date references relevant to this checklist, see [www.consort-statement.org](http://www.consort-statement.org).

41

42

# BMJ Open

## Injury of the mammillothalamic tract in patients with subarachnoid hemorrhage: a retrospective diffusion tensor imaging study

|                                 |                                                                                                                                                                                                                                                                                                                                                                                                                                                                                                              |
|---------------------------------|--------------------------------------------------------------------------------------------------------------------------------------------------------------------------------------------------------------------------------------------------------------------------------------------------------------------------------------------------------------------------------------------------------------------------------------------------------------------------------------------------------------|
| Journal:                        | <i>BMJ Open</i>                                                                                                                                                                                                                                                                                                                                                                                                                                                                                              |
| Manuscript ID:                  | bmjopen-2014-005613.R2                                                                                                                                                                                                                                                                                                                                                                                                                                                                                       |
| Article Type:                   | Research                                                                                                                                                                                                                                                                                                                                                                                                                                                                                                     |
| Date Submitted by the Author:   | 06-Jul-2014                                                                                                                                                                                                                                                                                                                                                                                                                                                                                                  |
| Complete List of Authors:       | Jang, Sung Ho; College of Medicine, Yeungnam University, Physical Medicine and Rehabilitation<br>Choi, Byung Yeon; College of Medicine, Yeungnam University, Neurosurgery<br>Kim, Seong Ho; College of Medicine, Yeungnam University, Neurosurgery<br>Chang, Chul Hoon; College of Medicine, Yeungnam University, Neurosurgery<br>Jung, Young Jin; College of Medicine, Yeungnam University, Neurosurgery<br>Kwon, Hyeok Gyu; College of Medicine, Yeungnam University, Physical Medicine and Rehabilitation |
| <b>Primary Subject Heading</b>: | Rehabilitation medicine                                                                                                                                                                                                                                                                                                                                                                                                                                                                                      |
| Secondary Subject Heading:      | Neurology                                                                                                                                                                                                                                                                                                                                                                                                                                                                                                    |
| Keywords:                       | REHABILITATION MEDICINE, Magnetic resonance imaging < RADIOLOGY & IMAGING, Neurological injury < NEUROLOGY                                                                                                                                                                                                                                                                                                                                                                                                   |
|                                 |                                                                                                                                                                                                                                                                                                                                                                                                                                                                                                              |

SCHOLARONE™  
Manuscripts

1  
2  
3  
4 **Title: Injury of the mammillothalamic tract in patients with subarachnoid hemorrhage:**  
5 **a retrospective diffusion tensor imaging study**  
6  
7

8 **Running title: Injury of the mammillothalamic tract**  
9  
10

11  
12  
13 Author 1: Sung Ho Jang, MD

14 Department of Physical Medicine and Rehabilitation, College of Medicine, Yeungnam  
15 University

16 e-mail: strokerehab@hanmail.net  
17  
18

19  
20  
21 Author 2 : Byung Yeon Choi, MD

22 Department of Neurosurgery, College of Medicine, Yeungnam University

23 e-mail: bychoi@med.yu.ac.kr  
24  
25

26  
27  
28 Author 3 : Seong Ho Kim, MD

29 Department of Neurosurgery, College of Medicine, Yeungnam University

30 e-mail: shkim@medical.yeungnam.ac.kr  
31  
32

33  
34  
35 Author 4 : Chul Hoon Chang, MD

36 Department of Neurosurgery, College of Medicine, Yeungnam University

37 e-mail: cch0102@yumail.ac.kr  
38  
39

40  
41  
42 Author 5: Young Jin Jung, MD

43 Department of Neurosurgery, College of Medicine, Yeungnam University

44 e-mail: sofesofe@hanmail.net  
45  
46

47  
48 Author 6 (Corresponding author): Hyeok Gyu Kwon, MS

49 Department of Physical Medicine and Rehabilitation, College of Medicine, Yeungnam  
50 University  
51  
52

1  
2  
3  
4 Mailing Address: Department of Physical Medicine and Rehabilitation, College of Medicine,  
5 Yeungnam University 317-1, Daemyung dong, Namku, Daegu, 705-717, Republic of Korea  
6  
7 Tel: 82-53-620-4098      FAX: 82-53-625-3508      e-mail: khg0715@hanmail.net  
8  
9  
10  
11  
12  
13  
14  
15  
16  
17  
18  
19  
20  
21  
22  
23  
24  
25  
26  
27  
28  
29  
30  
31  
32  
33  
34  
35  
36  
37  
38  
39  
40  
41  
42  
43  
44  
45  
46  
47  
48  
49  
50  
51  
52  
53  
54  
55  
56  
57  
58  
59  
60

For peer review only

**Abstract**

**Objective:** Few studies have reported on injury of the mammillothalamic tract (MTT) in stroke patients. However, no study in patients with subarachnoid hemorrhage (SAH) has been reported. Using diffusion tensor tractography (DTT), we attempted to investigate injury of the MTT in patients with subarachnoid hemorrhage.

**Methods:** We recruited 16 patients with SAH and 15 control subjects. Diffusion tensor imaging (DTI) was obtained at  $5.7 \pm 1.5$  weeks after onset and reconstruction of the MTT was performed using the probabilistic tractography method. The fractional anisotropy (FA) value and tract number of the MTT and the Mini-Mental State Examination (MMSE) score were determined. Values of FA and tract volume showing decrement of more than two standard deviations that of normal control were defined as abnormal.

**Results:** The FA value and tract volume in the patient group were significantly lower than those of the control group ( $p < .05$ ). In addition, MMSE showed strong ( $r = 0.67$ ,  $p = 0.005$ ) positive correlation with tract volume without correlation with FA. In the individual analysis, 16 MTTs of 32 MTTs in 16 patients showed abnormalities of the MTT in terms of the FA value, the tract volume, or the presence of a reconstructed MTT. As a result, ten (62.5%) of 16 patients showed abnormality of the MTT in at least one hemisphere.

**Conclusion:** We found that patients with SAH showed injury of the MTT and this injury showed correlation with cognitive dysfunction.

**Keywords:** Mammillothalamic tract, Subarachnoid hemorrhage, Diffusion tensor tractography



### Strengths and limitations of this study

- This is the first study on the injury of the mammillothalamic tract (MTT) in patients with subarachnoid hemorrhage (SAH) using diffusion tensor imaging (DTI).
- The main strength of our study is to find the relation between MTT injury and cognitive function with SAH
- Limitation of our study is that fiber tracking of the MTT might be affected by artifact, such as an aneurysmal clip. Therefore, conduct of further studies to overcome this limitation would be necessary.

## Introduction

The mammillothalamic tract (MTT) connects the mammillary body and the anterior thalamus as a part of the Papez circuit.<sup>1</sup> Because of the anatomical characteristics of the MTT, thin, short, and located deep within the brain, accurate estimation of the MTT has been difficult in the live human brain. However, diffusion tensor tractography (DTT), which is derived from diffusion tensor imaging (DTI), allows for reconstruction of the MTT in the human brain.<sup>2</sup> Therefore, accurate estimation of the MTT in terms of DTI parameters and three-dimensional configuration is now possible.<sup>2</sup> A few studies have reported on injury of the MTT in thalamic hemorrhage and thalamic infarct, however, so far, little is known about injury of the MTT.<sup>3 4</sup>

Subarachnoid hemorrhage (SAH) is extravasation of blood into the subarachnoid space accompanied by various neurological sequelae in terms of memory, executive function, language, motor function, and cranial nerve function.<sup>5-16</sup> In particular, memory deficit is known to be one of the most common sequelae of SAH.<sup>7 8 10 11 14</sup> In the past, previous studies have suggested that the neurotoxic effects of blood, vasospasm, or increased intracranial pressure are pathogenic mechanisms of neural sequelae following SAH.<sup>5 7 17-23</sup> After introduction of DTI, among the neural tracts associated with memory, injuries in the fornix and cingulum were reported in patients with SAH.<sup>24</sup> However, no study on neural injury of the MTT in patients with SAH has been reported. In this study, we hypothesized that the MTT would be injured due to SAH.

In the current study, using DTT, we attempted to investigate injury of the MTT in patients with SAH.

## Methods

### Subjects

Among 55 patients, 39 patients were excluded due to the hydrocephalus (8 patients), intracerebral hemorrhage (14 patients), or intraventricular hemorrhage (17 patients). The remained 16 patients (male: 9, female: 7, mean age:  $51.6 \pm 13.3$  years, range: 34~70 years) and 15 normal healthy control subjects (male: 7, female: 8, mean age:  $48.1 \pm 15.1$  years, range: 20~67 years) with no previous history of neurological, physical, or psychiatric illness were recruited for this study. Inclusion criteria for patients were as follows: (1) first ever stroke, (2) age 30~70 years, (3) hemorrhage in the subarachnoid space due to aneurismal rupture confirmed by a neuroradiologist, (4) DTI was scanned at a chronic stage after onset, and (5) no hydrocephalus, intracerebral hemorrhage, or intraventricular hemorrhage. Severity of SAH was assessed according to the modified Fisher CT grade, World Federation of Neurosurgical Societies (WFNS) and Hijdra score.<sup>25-27</sup> Patients who showed any lesion or artifact due to the clipping or coiling along or around the MTT pathway between the mammillary body and thalamus were excluded. This study was conducted retrospectively and the study protocol was approved by the Institutional Review Board of a university hospital.

---

Figure 1

---

### Clinical evaluation

Cognitive function was evaluated at the time of DTI scanning. The mini-mental state examination (MMSE) was used for assessment of cognitive impairment. The reliability and

1  
2  
3  
4 validity of the MMSE have been well established.<sup>28</sup>  
5  
6  
7  
8  
9

### 10 **Diffusion tensor tractography**

11  
12  
13 A 6-channel head coil on a 1.5 T Philips Gyroscan Intera (Philips, Ltd, Best, The  
14 Netherlands) with single-shot echo-planar imaging was used for acquisition of DTI data. For  
15 each of the 32 non-collinear diffusion sensitizing gradients, we acquired 67 contiguous slices  
16 parallel to the anterior commissure-posterior commissure line. Imaging parameters were as  
17 follows: acquisition matrix =  $96 \times 96$ ; reconstructed to matrix =  $128 \times 128$ ; field of view =  
18  $221 \times 221 \text{ mm}^2$ ; TR = 10,726 ms; TE = 76 ms; parallel imaging reduction factor (SENSE  
19 factor) = 2; EPI factor = 49;  $b = 1000 \text{ s/mm}^2$ ; NEX = 1; and a slice thickness of 2.3 mm  
20 (acquired voxel size  $1.73 \times 1.73 \times 2.3 \text{ mm}^3$ ). Affine multi-scale two-dimensional registration  
21 using the Oxford Centre for Functional Magnetic Resonance Imaging of Brain (FMRIB)  
22 Software Library (FSL; [www.fmrib.ox.ac.uk/fsl](http://www.fmrib.ox.ac.uk/fsl)) was used for removal of eddy current-  
23 induced image distortions.<sup>29</sup> Fiber tracking was performed using a probabilistic tractography  
24 method based on a multi-fiber model, and applied in the current study utilizing tractography  
25 routines implemented in FMRIB Diffusion (5000 streamline samples, 0.5 mm step lengths,  
26 curvature thresholds = 0.2).<sup>29-31</sup> MTTs were determined by selection of fibers passing through  
27 three regions of interest (ROIs). Seed ROIs were placed on the mammillary body on the axial  
28 image.<sup>2</sup> Two target ROIs were drawn at the portion of the MTT area (between the portion of  
29 the fornix and the red nucleus in the anteroposterior direction) at about the bicommissural  
30 level and the portion of the anterior thalamus on the axial image.<sup>2</sup> Of 5000 samples generated  
31 from each seed voxel, results for each contact were the visualized threshold point at 5  
32  
33  
34  
35  
36  
37  
38  
39  
40  
41  
42  
43  
44  
45  
46  
47  
48  
49  
50  
51  
52  
53  
54  
55  
56  
57  
58  
59  
60

1  
2  
3  
4 streamline through each voxel for analysis. Values of fractional anisotropy (FA) and tract  
5  
6 volume which was determined by counting the voxels of MTT were measured using  
7  
8 MATLAB™ (Matlab R2007b, The Mathworks, Natick, MA, USA). Values of FA and tract  
9  
10 volume showing decrement of more than two standard deviations that of normal control were  
11  
12 defined as abnormal.  
13

### 14 15 16 17 18 19 **Statistical analysis**

20  
21  
22 We used SPSS software (v.15.0; SPSS, Chicago, IL) for data analysis. Demographic  
23  
24 data in duration from onset and age was tested for normality. Data on MTTs that were not  
25  
26 reconstructed were excluded in statistical analysis. An independent t-test was used for  
27  
28 determination of variances in the value of FA and tract volume between the patient and  
29  
30 control group. Subsequently, using Pearson correlation, DTT parameters for FA and tract  
31  
32 volume of the patient group were used in determination of correlation with MMSE.<sup>32</sup> The  
33  
34 significant level of the *p* value was set at 0.05.  
35  
36  
37  
38  
39  
40  
41  
42  
43  
44  
45  
46  
47  
48  
49  
50  
51  
52  
53  
54  
55  
56  
57  
58  
59  
60

## Results

A summary of the demographic data for the patient and control groups is shown in Table 1. The artery distribution of aneurismal rupture for SAH in 16 patients was as follows: the anterior communicating artery: 11 patients (68.8%), the middle cerebral artery: three patients (18.8%), the posterior communicating artery: one patient (6.2%), and the anterior cerebral artery: one patient (6.2%). In addition, 12 patients (75%) patients underwent aneurysmal clipping and two patients underwent endovascular coiling (12.5%). The two remaining patients (12.5%) received conservative treatment. Average MMSE was  $19.8 \pm 8.8$ . Average modified Fisher CT grade, WFNS, and Hijdra score were  $2.5 \pm 0.9$ ,  $2.1 \pm 1.3$ , and  $15.7 \pm 6.3$ , respectively.<sup>25-28</sup> DTI scanning was performed at  $5.7 \pm 1.5$  weeks (range: 4~8 weeks) after SAH onset. Demographic data of the patient (duration from onset and age) and control (age) group were met the normality ( $p > .05$ ).

---

Table 1

---

A summary of the results of DTT parameters for MTT in the patient and control groups is shown in Table 2. Values for FA and tract volume were significantly lower in the patient group than in the control group, respectively ( $p < .05$ ). The tract volume of the MTT showed strong ( $r = 0.67$ ,  $p = 0.005$ ) positive correlation with MMSE, however, no correlation was observed between the FA value of MTT and MMSE ( $r = 0.41$ ,  $p = 0.11$ ).<sup>32</sup>

---

Table 2

---

Figure 2 shows the results for incidence of injury of the MTT with DTT parameters. Among 32 hemispheres of 16 patients, the MTT was not reconstructed in five hemispheres of

1  
2  
3  
4 four patients (right hemisphere: two, left hemisphere: one, both hemispheres: one); in contrast,  
5  
6 the MTTs were reconstructed in all 30 hemispheres of 15 control subjects. With regard to the  
7  
8 FA and tract volume, nine MTTs in six patients (right hemisphere: one, left hemisphere: two,  
9  
10 both hemispheres: three) and 13 MTTs in nine patients (right hemisphere: four, left  
11  
12 hemisphere: one, both hemispheres: four) of 32 hemispheres in 16 patients revealed a  
13  
14 decrement of more than two standard deviations, compared with control subjects. Six MTTs  
15  
16 in five patients (right hemisphere: three, left hemisphere: one, both hemispheres: one) showed  
17  
18 a decrement of more than two standard deviations in both FA and tract volume. As a result,  
19  
20 16 MTTs (right hemisphere: two, left hemisphere: two, both hemispheres: six) of 32 MTTs in  
21  
22 16 patients showed abnormalities of the MTT. Three patients in one hemisphere and one  
23  
24 patient in both hemispheres whose MTT was not reconstructed belonged to these 16 patients.  
25  
26 Consequently, in the individual analysis, the prevalence of MTT abnormality was 62.5% (10  
27  
28 of 16 patients).  
29  
30  
31  
32

---

33  
34 Fig 2  
35  
36  
37  
38  
39  
40  
41  
42  
43  
44  
45  
46  
47  
48  
49  
50  
51  
52  
53  
54  
55  
56  
57  
58  
59  
60

## Discussion

In the current study, we investigated injury of the MTT in patients with SAH using DTT. We obtained the following results: 1) the FA value and tract volume in the patient group were significantly lower than those of the control group, 2) MMSE showed strong ( $r=0.67$ ,  $p=0.005$ ) positive correlation with tract volume without correlation with FA value, 3) in the individual analysis, 16 MTTs of 32 MTTs in 16 patients showed abnormalities of the MTT in terms of the FA value, tract volume, or the presence of a reconstructed MTT. As a result, ten (62.5%) of 16 patients showed abnormality of the MTT in at least one hemisphere. The FA value indicates the degree of directionality of water diffusion and has a range of zero (completely isotropic diffusion) to one (completely anisotropic diffusion). It represents the white matter organization: in detail, the degree of directionality and integrity of white matter microstructures such as axons, myelin, and microtubules.<sup>33</sup> In contrast, tract volume, the number of voxels in a neural tract, reflects the neural fibers contained within a neural tract.<sup>34</sup> Therefore, a decrease in the FA or tract volume indicates an injury of the neural tract. Consequently, our results showing that the FA value and tract volume in the patient group were significantly lower than those of the control group indicate injury of the MTT in the patient group. Regarding the relation between MTT injury and cognition, MMSE showed strong positive correlation with the tract volume of the MTT without correlation with FA.<sup>32</sup> These results appear to indicate that the tract volume is more sensitive than the FA value for detection of injury of the MTT. The MMSE is the most widely used tool for screening cognitive dysfunction.<sup>35</sup> Because this study was conducted retrospectively, we could not employ detailed neuropsychological testing for evaluation of the function of the MTT. Therefore, conduct of further prospective studies, including specific neurophysiological tests



1  
2  
3  
4 for MTT function should be encouraged.  
5  
6

7 The pathogenic mechanism of neural injury following SAH has not been elucidated and  
8 few DTI studies have reported on this mechanism.<sup>15 36</sup> In 2007, Liu et al. demonstrated that  
9 SAH caused global mild vasogenic edema in white matter and deep gray matter by measuring  
10 the apparent diffusion coefficient value in the subacute stage of SAH, which was  
11 undetectable on T2-weighted and diffusion-weighted MR images.<sup>36</sup> In a recent study, Yeo et  
12 al. [2012] reported injury of the CST at the midbrain in patients with SAH.<sup>15</sup> This study  
13 suggested that frequent occurrence of SAH into perimesencephalic cisterns could be ascribed  
14 to injury of the CST, through mechanical (increased intracranial pressure or direct mass) or  
15 chemical mechanisms (a blood clot itself can cause extensive damage).<sup>5 23 37</sup> Considering that  
16 the MTT is located in close proximity to a cistern, the MTT in patients with SAH appears to  
17 be injured by mechanisms similar to those of CST injury at the midbrain.<sup>5 15 17 18 23</sup>  
18  
19  
20  
21  
22  
23  
24  
25  
26  
27  
28  
29  
30  
31

32 As for injury of the MTT, to the best of our knowledge, one study was reported in  
33 patients with thalamic hemorrhage.<sup>3</sup> Therefore, this is the first DTI study on injury of the  
34 MTT in patients with SAH. However, several limitations of DTI should be considered.<sup>38 39</sup>  
35 First, DTI is a powerful anatomic imaging tool that can demonstrate gross fiber architecture;  
36 however, reflection of all fibers, particularly small fibers, can be difficult. Second, fiber  
37 tracking of the MTT might be affected by artifact, such as an aneurysmal clip. Third, we  
38 investigated only injury of the MTT following SAH even though other tracts such as fornix,  
39 cingulum, thalamocortical tract of Papez circuit might be also injured. Therefore, conduct of  
40 further studies to overcome these limitations would be necessary.  
41  
42  
43  
44  
45  
46  
47  
48  
49  
50  
51

52  
53 In conclusion, we found injury of the MTT in the patient group, compared with the  
54  
55

1  
2  
3  
4 control group. In addition, in the individual analysis, 16 MTTs (50%) of 32 hemispheres  
5  
6 showed injury of the MTT and ten (62.5%) of 16 patients showed injury of the MTT in at  
7  
8 least in one hemisphere in terms of DTT parameters or the presence of a reconstructed MTT.  
9  
10  
11  
12  
13  
14  
15  
16  
17  
18  
19  
20  
21  
22  
23  
24  
25  
26  
27  
28  
29  
30  
31  
32  
33  
34  
35  
36  
37  
38  
39  
40  
41  
42  
43  
44  
45  
46  
47  
48  
49  
50  
51  
52  
53  
54  
55  
56  
57  
58  
59  
60

For peer review only

**Acknowledgement**

This research was supported by Basic Science Research Program through the National Research Foundation of Korea(NRF) funded by the Ministry of Education, Science and Technology(2012R1A1A4A01001873).

**Contributorship statement**

Sung Ho Jang: Conceiving and designing the study, funding, data acquisition, manuscript development and manuscript writing. Byung Yeon Choi: Acquisition and analysis of data, Seong Ho Kim: Research design and data acquisition. Chul Hoon Chang: Research design and data acquisition. Young Jin Jung: Research design and technical support. Hyeok Gyu Kwon: Manuscript development, data acquisition, manuscript writing and manuscript authorization.

**Competing interests**

None

**Funding**

This research was supported by Basic Science Research Program through the National Research Foundation of Korea(NRF) funded by the Ministry of Education, Science and Technology(2012R1A1A4A01001873).

**Data sharing statement**

No additional data are available.

**Ethics approval**

This study protocol was approved by the Institutional Review Board of the Yeungnam university hospital.

## References

1. Aggleton JP, Brown MW. Episodic memory, amnesia, and the hippocampal-anterior thalamic axis. *Behav Brain Sci* 1999;22:425-44; discussion 44-89.
2. Kwon HG, Hong JH, Jang SH. Mammillothalamic tract in human brain: diffusion tensor tractography study. *Neurosci Lett* 2010;481:51-3.
3. Jang SH, Lee HD, Kwon HG. Injury of the mammillothalamic tract in patients with thalamic hemorrhage. *Front Hum Neurosci* 2014;8:259.
4. Jang SH, Jun L, Kwon HG. Mystery Case: Injuries of neural tracts in the Papez circuit following anterior thalamic infarction. *Neurology* 2014;82:e178-9.
5. van Gijn J, van Dongen KJ, Vermeulen M, *et al.* Perimesencephalic hemorrhage: a nonaneurysmal and benign form of subarachnoid hemorrhage. *Neurology* 1985;35:493-7.
6. Ferrante L, Acqui M, Mastronardi L, *et al.* Posterior inferior cerebellar artery (PICA) aneurysm presenting with SAH and contralateral crural monoparesis: a case report. *Surg Neurol* 1992;38:43-5.
7. Ogden JA, Mee EW, Henning M. A prospective study of impairment of cognition and memory and recovery after subarachnoid hemorrhage. *Neurosurgery* 1993;33:572-86; discussion 86-7.
8. Ostbye T, Levy AR, Mayo NE. Hospitalization and case-fatality rates for subarachnoid hemorrhage in Canada from 1982 through 1991. The Canadian Collaborative Study Group of Stroke Hospitalizations. *Stroke* 1997;28:793-8.
9. Powell J, Kitchen N, Heslin J, *et al.* Psychosocial outcomes at three and nine months after good neurological recovery from aneurysmal subarachnoid haemorrhage:

- 1  
2  
3  
4 predictors and prognosis. *J Neurol Neurosurg Psychiatry* 2002;72:772-81.
- 5  
6 10. Kreiter KT, Copeland D, Bernardini GL, *et al.* Predictors of cognitive dysfunction  
7  
8 after subarachnoid hemorrhage. *Stroke* 2002;33:200-8.
- 9  
10  
11 11. Mayer SA, Kreiter KT, Copeland D, *et al.* Global and domain-specific cognitive  
12  
13 impairment and outcome after subarachnoid hemorrhage. *Neurology* 2002;59:1750-8.
- 14  
15  
16 12. Orbo M, Waterloo K, Egge A, *et al.* Predictors for cognitive impairment one year after  
17  
18 surgery for aneurysmal subarachnoid hemorrhage. *J Neurol* 2008;255:1770-6.
- 19  
20  
21 13. Wong GK, Wong R, Mok VC, *et al.* Clinical study on cognitive dysfunction after  
22  
23 spontaneous subarachnoid haemorrhage: patient profiles and relationship to  
24  
25 cholinergic dysfunction. *Acta Neurochir (Wien)* 2009;151:1601-7.
- 26  
27  
28 14. Al-Khindi T, Macdonald RL, Schweizer TA. Cognitive and functional outcome after  
29  
30 aneurysmal subarachnoid hemorrhage. *Stroke* 2010;41:e519-36.
- 31  
32  
33 15. Yeo SS, Choi BY, Chang CH, *et al.* Evidence of corticospinal tract injury at midbrain  
34  
35 in patients with subarachnoid hemorrhage. *Stroke* 2012;43:2239-41.
- 36  
37  
38 16. Sheldon S, Macdonald RL, Schweizer TA. Free recall memory performance after  
39  
40 aneurysmal subarachnoid hemorrhage. *J Int Neuropsychol Soc* 2012;18:334-42.
- 41  
42  
43 17. Smith B. Cerebral Pathology in Subarachnoid Haemorrhage. *J Neurol Neurosurg*  
44  
45 *Psychiatry* 1963;26:535-9.
- 46  
47  
48 18. Grote E, Hassler W. The critical first minutes after subarachnoid hemorrhage.  
49  
50 *Neurosurgery* 1988;22:654-61.
- 51  
52  
53 19. Hardemark HG, Almqvist O, Johansson T, *et al.* S-100 protein in cerebrospinal fluid  
54  
55 after aneurysmal subarachnoid haemorrhage: relation to functional outcome, late CT  
56  
57 and SPECT changes, and signs of higher cortical dysfunction. *Acta Neurochir (Wien)*  
58  
59  
60

- 1  
2  
3  
4 1989;99:135-44.  
5  
6 20. Jackowski A, Crockard A, Burnstock G, *et al.* The time course of intracranial  
7 pathophysiological changes following experimental subarachnoid haemorrhage in the  
8 rat. *J Cereb Blood Flow Metab* 1990;10:835-49.  
9  
10  
11  
12 21. Germano AF, Dixon CE, d'Avella D, *et al.* Behavioral deficits following experimental  
13 subarachnoid hemorrhage in the rat. *J Neurotrauma* 1994;11:345-53.  
14  
15  
16  
17 22. Germano A, Caruso G, Caffo M, *et al.* Does subarachnoid blood extravasation per se  
18 induce long-term neuropsychological and cognitive alterations? *Acta Neurochir*  
19 *(Wien)* 1998;140:805-11; discussion 11-2.  
20  
21  
22  
23 23. Chua CO, Chahboune H, Braun A, *et al.* Consequences of intraventricular  
24 hemorrhage in a rabbit pup model. *Stroke* 2009;40:3369-77.  
25  
26  
27  
28 24. Hong JH, Choi BY, Chang CH, *et al.* Injuries of the cingulum and fornix after rupture  
29 of an anterior communicating artery aneurysm: a diffusion tensor tractography study.  
30 *Neurosurgery* 2012;70:819-23.  
31  
32  
33  
34 25. Teasdale GM, Drake CG, Hunt W, *et al.* A universal subarachnoid hemorrhage scale:  
35 report of a committee of the World Federation of Neurosurgical Societies. *J Neurol*  
36 *Neurosurg Psychiatry* 1988;51:1457.  
37  
38  
39  
40 26. Hijdra A, Brouwers PJ, Vermeulen M, *et al.* Grading the amount of blood on  
41 computed tomograms after subarachnoid hemorrhage. *Stroke* 1990;21:1156-61.  
42  
43  
44  
45 27. Frontera JA, Claassen J, Schmidt JM, *et al.* Prediction of symptomatic vasospasm  
46 after subarachnoid hemorrhage: the modified fisher scale. *Neurosurgery* 2006;59:21-  
47 7; discussion -7.  
48  
49  
50  
51 28. Dick JP, Guiloff RJ, Stewart A, *et al.* Mini-mental state examination in neurological  
52  
53  
54  
55

- 1  
2  
3  
4 patients. *J Neurol Neurosurg Psychiatry* 1984;47:496-9.
- 5  
6 29. Smith SM, Jenkinson M, Woolrich MW, *et al.* Advances in functional and structural  
7  
8 MR image analysis and implementation as FSL. *Neuroimage* 2004;23 Suppl 1:S208-  
9  
10 19.
- 11  
12 30. Behrens TE, Johansen-Berg H, Woolrich MW, *et al.* Non-invasive mapping of  
13  
14 connections between human thalamus and cortex using diffusion imaging. *Nat*  
15  
16 *Neurosci* 2003;6:750-7.
- 17  
18 31. Behrens TE, Berg HJ, Jbabdi S, *et al.* Probabilistic diffusion tractography with  
19  
20 multiple fibre orientations: What can we gain? *Neuroimage* 2007;34:144-55.
- 21  
22 32. Rea LM, Parker RA: Designing and conducting survey research : a comprehensive  
23  
24 guide, ed 3rd. San Francisco: Jossey-Bass; 2005.
- 25  
26 33. Assaf Y, Pasternak O. Diffusion tensor imaging (DTI)-based white matter mapping in  
27  
28 brain research: a review. *J Mol Neurosci* 2008;34:51-61.
- 29  
30 34. Kwak SY, Yeo SS, Choi BY, *et al.* Corticospinal tract change in the unaffected  
31  
32 hemisphere at the early stage of intracerebral hemorrhage: a diffusion tensor  
33  
34 tractography study. *Eur Neurol* 2010;63:149-53.
- 35  
36 35. Folstein MF, Folstein SE, McHugh PR. "Mini-mental state". A practical method for  
37  
38 grading the cognitive state of patients for the clinician. *J Psychiatr Res* 1975;12:189-  
39  
40 98.
- 41  
42 36. Liu Y, Soppi V, Mustonen T, *et al.* Subarachnoid hemorrhage in the subacute stage:  
43  
44 elevated apparent diffusion coefficient in normal-appearing brain tissue after  
45  
46 treatment. *Radiology* 2007;242:518-25.
- 47  
48 37. Jang SH. Somatotopic arrangement and location of the corticospinal tract in the  
49  
50  
51  
52  
53  
54  
55

60

- 1  
2  
3  
4 brainstem of the human brain. *Yonsei Med J* 2011;52:553-7.  
5  
6 38. Yamada K, Sakai K, Akazawa K, *et al.* MR tractography: a review of its clinical  
7  
8 applications. *Magn Reson Med Sci* 2009;8:165-74.  
9  
10 39. Lee SK, Kim DI, Kim J, *et al.* Diffusion-tensor MR imaging and fiber tractography: a  
11  
12 new method of describing aberrant fiber connections in developmental CNS  
13  
14 anomalies. *Radiographics* 2005;25:53-65; discussion 6-8.  
15  
16  
17  
18  
19  
20  
21  
22  
23  
24  
25  
26  
27  
28  
29  
30  
31  
32  
33  
34  
35  
36  
37  
38  
39  
40  
41  
42  
43  
44  
45  
46  
47  
48  
49  
50  
51  
52  
53  
54  
55  
56  
57  
58  
59  
60



1  
2  
3  
4 **Figure legend**  
5  
6

7 **Fig 1.** Diffusion tensor tractography (DTT) for the mammillothalamic tract (MTT). Brain CT  
8 shows subarachnoid hemorrhage and the MTTs in both hemispheres of a patient (34-year old  
9 male) are reconstructed between the mammillary body and the anterior thalamus. However,  
10 the right MTT (red) of the patient is thinned, compared with the left MTT (green) of the  
11 patients and normal control subjects.  
12  
13  
14  
15  
16  
17

18  
19 **Fig. 2.** The incidence of injury of the mammillothalamic tract  
20

21  
22 (FA: fractional anisotropy, MTT: mammillothalamic tract, TV: tract volume)  
23  
24  
25  
26  
27  
28  
29  
30  
31  
32  
33  
34  
35  
36  
37  
38  
39  
40  
41  
42  
43  
44  
45  
46  
47  
48  
49  
50  
51  
52  
53  
54  
55  
56  
57  
58  
59  
60

**Table 1.** Demographic data for the patient and control groups.

|                                          | Patient group (n=16) | Control group (n=15) |
|------------------------------------------|----------------------|----------------------|
| Age (year)                               | 51.6±13.3            | 48.1±15.1            |
| Sex, male/female                         | 9 / 7                | 7 / 8                |
| Duration from onset (weeks)              | 5.7 ± 1.5            |                      |
| Modified Fisher grade                    | 2.5 ± 0.9            |                      |
| WFNS                                     | 2.1 ± 1.3            |                      |
| Hijdra score                             | 15.7 ± 6.3           |                      |
| Ruptured artery<br>(ACoA:ACA:MCA:PCA)    | 11:1:3:1             |                      |
| Operation type<br>(clipping:coiling:non) | 12:2:2               |                      |
| MMSE                                     | 19.8±8.8             |                      |

WFNS: World Federation of Neurosurgical Societies, ACoA: anterior communicating, ACA: anterior cerebral artery, MCA: middle cerebral artery, PCA: posterior communicating artery, MMSE: Mini-mental state examination

**Table 2.** Results of diffusion tensor tractography parameters of the mammillothalamic tract in the patient and control groups.

|               | Hemisphere | FA                | <i>p</i> | Tract volume         | <i>p</i> |
|---------------|------------|-------------------|----------|----------------------|----------|
| Patient group | Right      | 0.36 (0.04, 0.36) |          | 69.08 (30.33, 72.00) |          |
|               | Left       | 0.35 (0.04, 0.36) |          | 78.86 (28.80, 80.50) |          |
|               | Both       | 0.36 (0.04, 0.36) | .015*    | 74.15 (23.39, 74.00) | .000*    |
| Control group | Right      | 0.38 (0.04, 0.38) |          | 96.80 (22.7, 96.00)  |          |
|               | Left       | 0.37 (0.03, 0.38) |          | 99.73 (23.8, 103.00) |          |
|               | Both       | 0.38 (0.03, 0.38) |          | 98.27 (22.9, 98.50)  |          |

Values represent mean ( $\pm$ standard deviation, median value), FA: fractional anisotropy, *p*: An independent t-test for determination of variances in FA and tract volume between the patient and control groups.

\* *p* < .05

1  
2  
3  
4  
5  
6  
7  
8  
9  
10  
11  
12  
13  
14  
15  
16  
17  
18  
19  
20  
21  
22  
23  
24  
25  
26  
27  
28  
29  
30  
31  
32  
33  
34  
35  
36  
37  
38  
39  
40  
41  
42  
43  
44  
45  
46  
47  
48  
49  
50  
51  
52  
53  
54  
55  
56  
57  
58  
59  
60

For peer review only

1  
2  
3  
4 **Title: Injury of the mammillothalamic tract in patients with subarachnoid hemorrhage:**  
5 **a retrospective diffusion tensor imaging study**  
6  
7

8 **Running title: Injury of the mammillothalamic tract**  
9  
10

11  
12  
13 Author 1: Sung Ho Jang, MD

14 Department of Physical Medicine and Rehabilitation, College of Medicine, Yeungnam  
15 University

16 e-mail: [strokerehab@hanmail.net](mailto:strokerehab@hanmail.net)  
17  
18

19  
20  
21 Author 2 : Byung Yeon Choi, MD

22 Department of Neurosurgery, College of Medicine, Yeungnam University

23 e-mail: [bychoi@med.yu.ac.kr](mailto:bychoi@med.yu.ac.kr)  
24  
25

26  
27  
28 Author 3 : Seong Ho Kim, MD

29 Department of Neurosurgery, College of Medicine, Yeungnam University

30 e-mail: [shkim@medical.yeungnam.ac.kr](mailto:shkim@medical.yeungnam.ac.kr)  
31  
32

33  
34  
35 Author 4 : Chul Hoon Chang, MD

36 Department of Neurosurgery, College of Medicine, Yeungnam University

37 e-mail: [cch0102@yumail.ac.kr](mailto:cch0102@yumail.ac.kr)  
38  
39

40  
41  
42 Author 5: Young Jin Jung, MD

43 Department of Neurosurgery, College of Medicine, Yeungnam University

44 e-mail: [sofesofe@hanmail.net](mailto:sofesofe@hanmail.net)  
45  
46

47  
48 Author 6 (Corresponding author): Hyeok Gyu Kwon, MS

49 Department of Physical Medicine and Rehabilitation, College of Medicine, Yeungnam  
50 University  
51  
52

1  
2  
3  
4  
5  
6  
7  
8  
9  
10  
11  
12  
13  
14  
15  
16  
17  
18  
19  
20  
21  
22  
23  
24  
25  
26  
27  
28  
29  
30  
31  
32  
33  
34  
35  
36  
37  
38  
39  
40  
41  
42  
43  
44  
45  
46  
47  
48  
49  
50  
51  
52  
53  
54  
55  
56  
57  
58  
59  
60

Mailing Address: Department of Physical Medicine and Rehabilitation, College of Medicine,  
Yeungnam University 317-1, Daemyung dong, Namku, Daegu, 705-717, Republic of Korea  
Tel: 82-53-620-4098      FAX: 82-53-625-3508      e-mail: khg0715@hanmail.net

For peer review only

**Abstract**

**Objective:** Few studies have reported on injury of the mammillothalamic tract (MTT) in stroke patients. However, no study in patients with subarachnoid hemorrhage (SAH) has been reported. Using diffusion tensor tractography (DTT), we attempted to investigate injury of the MTT in patients with subarachnoid hemorrhage.

**Methods:** We recruited 16 patients with SAH and 15 control subjects. Diffusion tensor imaging (DTI) was obtained at  $5.7 \pm 1.5$  weeks after onset and reconstruction of the MTT was performed using the probabilistic tractography method. The fractional anisotropy (FA) value and tract number of the MTT and the Mini-Mental State Examination (MMSE) score were determined. Values of FA and tract volume showing decrement of more than two standard deviations that of normal control were defined as abnormal.

**Results:** The FA value and tract volume in the patient group were significantly lower than those of the control group ( $p < .05$ ). In addition, MMSE showed strong ( $r = 0.67$ ,  $p = 0.005$ ) positive correlation with tract volume without correlation with FA. In the individual analysis, 16 MTTs of 32 MTTs in 16 patients showed abnormalities of the MTT in terms of the FA value, the tract volume, or the presence of a reconstructed MTT. As a result, ten (62.5%) of 16 patients showed abnormality of the MTT in at least one hemisphere.

**Conclusion:** We found that patients with SAH showed injury of the MTT and this injury showed correlation with cognitive dysfunction.

**Keywords:** Mammillothalamic tract, Subarachnoid hemorrhage, Diffusion tensor tractography

#### Strengths and limitations of this study

- This is the first study on the injury of the mammillothalamic tract (MTT) in patients with subarachnoid hemorrhage (SAH) using diffusion tensor imaging (DTI).
- The main strength of our study is to find the relation between MTT injury and cognitive function with SAH
- Limitation of our study is that fiber tracking of the MTT might be affected by artifact, such as an aneurysmal clip. Therefore, conduct of further studies to overcome this limitation would be necessary.



## Introduction

The mammillothalamic tract (MTT) connects the mammillary body and the anterior thalamus as a part of the Papez circuit.<sup>1</sup> Because of the anatomical characteristics of the MTT, thin, short, and located deep within the brain, accurate estimation of the MTT has been difficult in the live human brain. However, diffusion tensor tractography (DTT), which is derived from diffusion tensor imaging (DTI), allows for reconstruction of the MTT in the human brain.<sup>2</sup> Therefore, accurate estimation of the MTT in terms of DTI parameters and three-dimensional configuration is now possible.<sup>2</sup> A few studies have reported on injury of the MTT in thalamic hemorrhage and thalamic infarct, however, so far, little is known about injury of the MTT.<sup>3 4</sup>

Subarachnoid hemorrhage (SAH) is extravasation of blood into the subarachnoid space accompanied by various neurological sequelae in terms of memory, executive function, language, motor function, and cranial nerve function.<sup>5-16</sup> In particular, memory deficit is known to be one of the most common sequelae of SAH.<sup>7 8 10 11 14</sup> In the past, previous studies have suggested that the neurotoxic effects of blood, vasospasm, or increased intracranial pressure are pathogenic mechanisms of neural sequelae following SAH.<sup>5 7 17-23</sup> After introduction of DTI, among the neural tracts associated with memory, injuries in the fornix and cingulum were reported in patients with SAH.<sup>24</sup> However, no study on neural injury of the MTT in patients with SAH has been reported. In this study, we hypothesized that the MTT would be injured due to SAH.

In the current study, using DTT, we attempted to investigate injury of the MTT in patients with SAH.

## Methods

### Subjects

Among 55 patients, 39 patients were excluded due to the hydrocephalus (8 patients), intracerebral hemorrhage (14 patients), or intraventricular hemorrhage (17 patients). The remained ~~We recruited~~ 16 patients (male: 9, female: 7, mean age: 51.6±13.3 years, range: 34~70 years) and 15 normal healthy control subjects (male: 7, female: 8, mean age: 48.1±15.1 years, range: 20~67 years) with no previous history of neurological, physical, or psychiatric illness were recruited for this study. Inclusion criteria for patients were as follows: (1) first ever stroke, (2) age 30~70 years, (3) hemorrhage in the subarachnoid space due to aneurismal rupture confirmed by a neuroradiologist, (4) DTI was scanned at a chronic stage after onset, and (5) no hydrocephalus, intracerebral hemorrhage, or intraventricular hemorrhage. Severity of SAH was assessed according to the modified Fisher CT grade, World Federation of Neurosurgical Societies (WFNS) and Hijdra score.<sup>25-27</sup> Patients who showed any lesion or artifact due to the clipping or coiling along or around the MTT pathway between the mammillary body and thalamus were excluded. This study was conducted retrospectively and the study protocol was approved by the Institutional Review Board of a university hospital.

---

Figure 1

---

### Clinical evaluation

Cognitive function was evaluated at the time of DTI scanning. The mini-mental state

1  
2  
3  
4 examination (MMSE) was used for assessment of cognitive impairment. The reliability and  
5  
6 validity of the MMSE have been well established.<sup>28</sup>  
7  
8

### 9 **Diffusion tensor tractography**

10  
11  
12 A 6-channel head coil on a 1.5 T Philips Gyroscan Intera (Philips, Ltd, Best, The  
13  
14 Netherlands) with single-shot echo-planar imaging was used for acquisition of DTI data. For  
15  
16 each of the 32 non-collinear diffusion sensitizing gradients, we acquired 67 contiguous slices  
17  
18 parallel to the anterior commissure-posterior commissure line. Imaging parameters were as  
19  
20 follows: acquisition matrix =  $96 \times 96$ ; reconstructed to matrix =  $128 \times 128$ ; field of view =  
21  
22  $221 \times 221 \text{ mm}^2$ ; TR = 10,726 ms; TE = 76 ms; parallel imaging reduction factor (SENSE  
23  
24 factor) = 2; EPI factor = 49;  $b = 1000 \text{ s/mm}^2$ ; NEX = 1; and a slice thickness of 2.3 mm  
25  
26 (acquired voxel size  $1.73 \times 1.73 \times 2.3 \text{ mm}^3$ ). Affine multi-scale two-dimensional registration  
27  
28 using the Oxford Centre for Functional Magnetic Resonance Imaging of Brain (FMRIB)  
29  
30 Software Library (FSL; [www.fmrib.ox.ac.uk/fsl](http://www.fmrib.ox.ac.uk/fsl)) was used for removal of eddy current-  
31  
32 induced image distortions.<sup>29</sup> Fiber tracking was performed using a probabilistic tractography  
33  
34 method based on a multi-fiber model, and applied in the current study utilizing tractography  
35  
36 routines implemented in FMRIB Diffusion (5000 streamline samples, 0.5 mm step lengths,  
37  
38 curvature thresholds = 0.2).<sup>29-31</sup> MTTs were determined by selection of fibers passing through  
39  
40 three regions of interest (ROIs). Seed ROIs were placed on the mammillary body on the axial  
41  
42 image.<sup>2</sup> Two target ROIs were drawn at the portion of the MTT area (between the portion of  
43  
44 the fornix and the red nucleus in the anteroposterior direction) at about the bicommissural  
45  
46 level and the portion of the anterior thalamus on the axial image.<sup>2</sup> Of 5000 samples generated  
47  
48 from each seed voxel, results for each contact were the visualized threshold point at 5  
49  
50 streamline through each voxel for analysis. Values of fractional anisotropy (FA) and tract  
51  
52  
53  
54  
55  
56  
57  
58  
59  
60

1  
2  
3  
4 volume which was determined by counting the voxels of MTT were measured using  
5  
6 MATLAB™ (Matlab R2007b, The Mathworks, Natick, MA, USA). Values of FA and tract  
7  
8 volume showing decrement of more than two standard deviations that of normal control were  
9  
10 defined as abnormal.  
11

### 12 13 14 **Statistical analysis**

15  
16  
17 We used SPSS software (v.15.0; SPSS, Chicago, IL) for data analysis. Demographic  
18  
19 data in duration from onset and age was tested for normality. Data on MTTs that were not  
20  
21 reconstructed were excluded in statistical analysis. An independent t-test was used for  
22  
23 determination of variances in the value of FA and tract volume between the patient and  
24  
25 control group. Subsequently, using Pearson correlation, DTT parameters for FA and tract  
26  
27 volume of the patient group were used in determination of correlation with MMSE.<sup>32</sup> The  
28  
29 significant level of the *p* value was set at 0.05.  
30  
31  
32  
33  
34  
35  
36  
37  
38  
39  
40  
41  
42  
43  
44  
45  
46  
47  
48  
49  
50  
51  
52  
53  
54  
55  
56  
57  
58  
59  
60

## Results

A summary of the demographic data for the patient and control groups is shown in Table 1. The artery distribution of aneurismal rupture for SAH in 16 patients was as follows: the anterior communicating artery: 11 patients (68.8%), the middle cerebral artery: three patients (18.8%), the posterior communicating artery: one patient (6.2%), and the anterior cerebral artery: one patient (6.2%). In addition, 12 patients (75%) patients underwent aneurysmal clipping and two patients underwent endovascular coiling (12.5%). The two remaining patients (12.5%) received conservative treatment. Average MMSE was  $19.8 \pm 8.8$ . Average modified Fisher CT grade, WFNS, and Hijdra score were  $2.5 \pm 0.9$ ,  $2.1 \pm 1.3$ , and  $15.7 \pm 6.3$ , respectively.<sup>25-28</sup> DTI scanning was performed at  $5.7 \pm 1.5$  weeks (range: 4~8 weeks) after SAH onset. Demographic data of the patient (duration from onset and age) and control (age) group were met the normality ( $p > .05$ ).

---

Table 1

---

A summary of the results of DTT parameters for MTT in the patient and control groups is shown in Table 2. Values for FA and tract volume were significantly lower in the patient group than in the control group, respectively ( $p < .05$ ). The tract volume of the MTT showed strong ( $r = 0.67$ ,  $p = 0.005$ ) positive correlation with MMSE, however, no correlation was observed between the FA value of MTT and MMSE ( $r = 0.41$ ,  $p = 0.11$ ).<sup>32</sup>

---

Table 2

---

Figure 2 shows the results for incidence of injury of the MTT with DTT parameters. Among 32 hemispheres of 16 patients, the MTT was not reconstructed in five hemispheres of

1  
2  
3  
4 four patients (right hemisphere: two, left hemisphere: one, both hemispheres: one); in contrast,  
5  
6 the MTTs were reconstructed in all 30 hemispheres of 15 control subjects. With regard to the  
7  
8 FA and tract volume, nine MTTs in six patients (right hemisphere: one, left hemisphere: two,  
9  
10 both hemispheres: three) and 13 MTTs in nine patients (right hemisphere: four, left  
11  
12 hemisphere: one, both hemispheres: four) of 32 hemispheres in 16 patients revealed a  
13  
14 decrement of more than two standard deviations, compared with control subjects. Six MTTs  
15  
16 in five patients (right hemisphere: three, left hemisphere: one, both hemispheres: one) showed  
17  
18 a decrement of more than two standard deviations in both FA and tract volume. As a result,  
19  
20 16 MTTs (right hemisphere: two, left hemisphere: two, both hemispheres: six) of 32 MTTs in  
21  
22 16 patients showed abnormalities of the MTT. Three patients in one hemisphere and one  
23  
24 patient in both hemispheres whose MTT was not reconstructed belonged to these 16 patients.  
25  
26 Consequently, in the individual analysis, the prevalence of MTT abnormality was 62.5% (10  
27  
28 of 16 patients).  
29  
30  
31  
32

---

33  
34 Fig 2  
35  
36  
37  
38  
39  
40  
41  
42  
43  
44  
45  
46  
47  
48  
49  
50  
51  
52  
53  
54  
55

---

## Discussion

In the current study, we investigated injury of the MTT in patients with SAH using DTT. We obtained the following results: 1) the FA value and tract volume in the patient group were significantly lower than those of the control group, 2) MMSE showed strong ( $r=0.67$ ,  $p=0.005$ ) positive correlation with tract volume without correlation with FA value, 3) in the individual analysis, 16 MTTs of 32 MTTs in 16 patients showed abnormalities of the MTT in terms of the FA value, tract volume, or the presence of a reconstructed MTT. As a result, ten (62.5%) of 16 patients showed abnormality of the MTT in at least one hemisphere. The FA value indicates the degree of directionality of water diffusion and has a range of zero (completely isotropic diffusion) to one (completely anisotropic diffusion). It represents the white matter organization: in detail, the degree of directionality and integrity of white matter microstructures such as axons, myelin, and microtubules.<sup>33</sup> In contrast, tract volume, the number of voxels in a neural tract, reflects the neural fibers contained within a neural tract.<sup>34</sup> Therefore, a decrease in the FA or tract volume indicates an injury of the neural tract. Consequently, our results showing that the FA value and tract volume in the patient group were significantly lower than those of the control group indicate injury of the MTT in the patient group. Regarding the relation between MTT injury and cognition, MMSE showed strong positive correlation with the tract volume of the MTT without correlation with FA.<sup>32</sup> These results appear to indicate that the tract volume is more sensitive than the FA value for detection of injury of the MTT. The MMSE is the most widely used tool for screening cognitive dysfunction.<sup>35</sup> Because this study was conducted retrospectively, we could not employ detailed neuropsychological testing for evaluation of the function of the MTT. Therefore, conduct of further prospective studies, including specific neurophysiological tests

1  
2  
3  
4 for MTT function should be encouraged.  
5  
6

7 The pathogenic mechanism of neural injury following SAH has not been elucidated and  
8 few DTI studies have reported on this mechanism.<sup>15 36</sup> In 2007, Liu et al. demonstrated that  
9 SAH caused global mild vasogenic edema in white matter and deep gray matter by measuring  
10 the apparent diffusion coefficient value in the subacute stage of SAH, which was  
11 undetectable on T2-weighted and diffusion-weighted MR images.<sup>36</sup> In a recent study, Yeo et  
12 al. [2012] reported injury of the CST at the midbrain in patients with SAH.<sup>15</sup> This study  
13 suggested that frequent occurrence of SAH into perimesencephalic cisterns could be ascribed  
14 to injury of the CST, through mechanical (increased intracranial pressure or direct mass) or  
15 chemical mechanisms (a blood clot itself can cause extensive damage).<sup>5 23 37</sup> Considering that  
16 the MTT is located in close proximity to a cistern, the MTT in patients with SAH appears to  
17 be injured by mechanisms similar to those of CST injury at the midbrain.<sup>5 15 17 18 23</sup>  
18  
19  
20  
21  
22  
23  
24  
25  
26  
27  
28  
29  
30  
31

32 As for injury of the MTT, to the best of our knowledge, one study was reported in  
33 patients with thalamic hemorrhage.<sup>3</sup> Therefore, this is the first DTI study on injury of the  
34 MTT in patients with SAH. However, several limitations of DTI should be considered.<sup>38 39</sup>  
35 First, DTI is a powerful anatomic imaging tool that can demonstrate gross fiber architecture;  
36 however, reflection of all fibers, particularly small fibers, can be difficult. Second, fiber  
37 tracking of the MTT might be affected by artifact, such as an aneurysmal clip. Third, we  
38 investigated only injury of the MTT following SAH even though other tracts such as fornix,  
39 cingulum, thalamocortical tract of Papez circuit might be also injured. Therefore, conduct of  
40 further studies to overcome these limitations would be necessary.  
41  
42  
43  
44  
45  
46  
47  
48  
49  
50  
51

52  
53 In conclusion, we found injury of the MTT in the patient group, compared with the  
54  
55



1  
2  
3  
4 control group. In addition, in the individual analysis, 16 MTTs (50%) of 32 hemispheres  
5  
6 showed injury of the MTT and ten (62.5%) of 16 patients showed injury of the MTT in at  
7  
8 least in one hemisphere in terms of DTT parameters or the presence of a reconstructed MTT.  
9  
10  
11  
12  
13  
14  
15  
16  
17  
18  
19  
20  
21  
22  
23  
24  
25  
26  
27  
28  
29  
30  
31  
32  
33  
34  
35  
36  
37  
38  
39  
40  
41  
42  
43  
44  
45  
46  
47  
48  
49  
50  
51  
52  
53  
54  
55  
56  
57  
58  
59  
60

For peer review only

**Acknowledgement**

This research was supported by Basic Science Research Program through the National Research Foundation of Korea(NRF) funded by the Ministry of Education, Science and Technology(2012R1A1A4A01001873).

**Contributorship statement**

Sung Ho Jang: Conceiving and designing the study, funding, data acquisition, manuscript development and manuscript writing. Byung Yeon Choi: Acquisition and analysis of data, Seong Ho Kim: Research design and data acquisition. Chul Hoon Chang: Research design and data acquisition. Young Jin Jung: Research design and technical support. Hyeok Gyu Kwon: Manuscript development, data acquisition, manuscript writing and manuscript authorization.

**Competing interests**

None

**Funding**

This research was supported by Basic Science Research Program through the National Research Foundation of Korea(NRF) funded by the Ministry of Education, Science and Technology(2012R1A1A4A01001873).

**Data sharing statement**

No additional data are available.

**Ethics approval**

This study protocol was approved by the Institutional Review Board of the Yeungnam university hospital.

## References

1. Aggleton JP, Brown MW. Episodic memory, amnesia, and the hippocampal-anterior thalamic axis. *Behav Brain Sci* 1999;22:425-44; discussion 44-89.
2. Kwon HG, Hong JH, Jang SH. Mammillothalamic tract in human brain: diffusion tensor tractography study. *Neurosci Lett* 2010;481:51-3.
3. Jang SH, Lee HD, Kwon HG. Injury of the mammillothalamic tract in patients with thalamic hemorrhage. *Front Hum Neurosci* 2014;8:259.
4. Jang SH, Jun L, Kwon HG. Mystery Case: Injuries of neural tracts in the Papez circuit following anterior thalamic infarction. *Neurology* 2014;82:e178-9.
5. van Gijn J, van Dongen KJ, Vermeulen M, *et al.* Perimesencephalic hemorrhage: a nonaneurysmal and benign form of subarachnoid hemorrhage. *Neurology* 1985;35:493-7.
6. Ferrante L, Acqui M, Mastronardi L, *et al.* Posterior inferior cerebellar artery (PICA) aneurysm presenting with SAH and contralateral crural monoparesis: a case report. *Surg Neurol* 1992;38:43-5.
7. Ogden JA, Mee EW, Henning M. A prospective study of impairment of cognition and memory and recovery after subarachnoid hemorrhage. *Neurosurgery* 1993;33:572-86; discussion 86-7.
8. Ostbye T, Levy AR, Mayo NE. Hospitalization and case-fatality rates for subarachnoid hemorrhage in Canada from 1982 through 1991. The Canadian Collaborative Study Group of Stroke Hospitalizations. *Stroke* 1997;28:793-8.
9. Powell J, Kitchen N, Heslin J, *et al.* Psychosocial outcomes at three and nine months after good neurological recovery from aneurysmal subarachnoid haemorrhage:

- 1  
2  
3  
4 predictors and prognosis. *J Neurol Neurosurg Psychiatry* 2002;72:772-81.
- 5  
6 10. Kreiter KT, Copeland D, Bernardini GL, *et al.* Predictors of cognitive dysfunction  
7  
8 after subarachnoid hemorrhage. *Stroke* 2002;33:200-8.
- 9  
10  
11 11. Mayer SA, Kreiter KT, Copeland D, *et al.* Global and domain-specific cognitive  
12  
13 impairment and outcome after subarachnoid hemorrhage. *Neurology* 2002;59:1750-8.
- 14  
15  
16 12. Orbo M, Waterloo K, Egge A, *et al.* Predictors for cognitive impairment one year after  
17  
18 surgery for aneurysmal subarachnoid hemorrhage. *J Neurol* 2008;255:1770-6.
- 19  
20  
21 13. Wong GK, Wong R, Mok VC, *et al.* Clinical study on cognitive dysfunction after  
22  
23 spontaneous subarachnoid haemorrhage: patient profiles and relationship to  
24  
25 cholinergic dysfunction. *Acta Neurochir (Wien)* 2009;151:1601-7.
- 26  
27  
28 14. Al-Khindi T, Macdonald RL, Schweizer TA. Cognitive and functional outcome after  
29  
30 aneurysmal subarachnoid hemorrhage. *Stroke* 2010;41:e519-36.
- 31  
32  
33 15. Yeo SS, Choi BY, Chang CH, *et al.* Evidence of corticospinal tract injury at midbrain  
34  
35 in patients with subarachnoid hemorrhage. *Stroke* 2012;43:2239-41.
- 36  
37  
38 16. Sheldon S, Macdonald RL, Schweizer TA. Free recall memory performance after  
39  
40 aneurysmal subarachnoid hemorrhage. *J Int Neuropsychol Soc* 2012;18:334-42.
- 41  
42  
43 17. Smith B. Cerebral Pathology in Subarachnoid Haemorrhage. *J Neurol Neurosurg*  
44  
45 *Psychiatry* 1963;26:535-9.
- 46  
47  
48 18. Grote E, Hassler W. The critical first minutes after subarachnoid hemorrhage.  
49  
50 *Neurosurgery* 1988;22:654-61.
- 51  
52  
53 19. Hardemark HG, Almqvist O, Johansson T, *et al.* S-100 protein in cerebrospinal fluid  
54  
55 after aneurysmal subarachnoid haemorrhage: relation to functional outcome, late CT  
56  
57 and SPECT changes, and signs of higher cortical dysfunction. *Acta Neurochir (Wien)*  
58  
59  
60

- 1  
2  
3  
4 1989;99:135-44.  
5  
6 20. Jackowski A, Crockard A, Burnstock G, *et al.* The time course of intracranial  
7 pathophysiological changes following experimental subarachnoid haemorrhage in the  
8 rat. *J Cereb Blood Flow Metab* 1990;10:835-49.  
9  
10  
11  
12 21. Germano AF, Dixon CE, d'Avella D, *et al.* Behavioral deficits following experimental  
13 subarachnoid hemorrhage in the rat. *J Neurotrauma* 1994;11:345-53.  
14  
15  
16  
17 22. Germano A, Caruso G, Caffo M, *et al.* Does subarachnoid blood extravasation per se  
18 induce long-term neuropsychological and cognitive alterations? *Acta Neurochir*  
19 *(Wien)* 1998;140:805-11; discussion 11-2.  
20  
21  
22  
23 23. Chua CO, Chahboune H, Braun A, *et al.* Consequences of intraventricular  
24 hemorrhage in a rabbit pup model. *Stroke* 2009;40:3369-77.  
25  
26  
27  
28 24. Hong JH, Choi BY, Chang CH, *et al.* Injuries of the cingulum and fornix after rupture  
29 of an anterior communicating artery aneurysm: a diffusion tensor tractography study.  
30 *Neurosurgery* 2012;70:819-23.  
31  
32  
33  
34 25. Teasdale GM, Drake CG, Hunt W, *et al.* A universal subarachnoid hemorrhage scale:  
35 report of a committee of the World Federation of Neurosurgical Societies. *J Neurol*  
36 *Neurosurg Psychiatry* 1988;51:1457.  
37  
38  
39  
40 26. Hijdra A, Brouwers PJ, Vermeulen M, *et al.* Grading the amount of blood on  
41 computed tomograms after subarachnoid hemorrhage. *Stroke* 1990;21:1156-61.  
42  
43  
44  
45 27. Frontera JA, Claassen J, Schmidt JM, *et al.* Prediction of symptomatic vasospasm  
46 after subarachnoid hemorrhage: the modified fisher scale. *Neurosurgery* 2006;59:21-  
47 7; discussion -7.  
48  
49  
50  
51 28. Dick JP, Guiloff RJ, Stewart A, *et al.* Mini-mental state examination in neurological  
52  
53  
54  
55

- 1  
2  
3  
4 patients. *J Neurol Neurosurg Psychiatry* 1984;47:496-9.
- 5  
6 29. Smith SM, Jenkinson M, Woolrich MW, *et al.* Advances in functional and structural  
7  
8 MR image analysis and implementation as FSL. *Neuroimage* 2004;23 Suppl 1:S208-  
9  
10 19.
- 11  
12 30. Behrens TE, Johansen-Berg H, Woolrich MW, *et al.* Non-invasive mapping of  
13  
14 connections between human thalamus and cortex using diffusion imaging. *Nat*  
15  
16 *Neurosci* 2003;6:750-7.
- 17  
18 31. Behrens TE, Berg HJ, Jbabdi S, *et al.* Probabilistic diffusion tractography with  
19  
20 multiple fibre orientations: What can we gain? *Neuroimage* 2007;34:144-55.
- 21  
22 32. Rea LM, Parker RA: Designing and conducting survey research : a comprehensive  
23  
24 guide, ed 3rd. San Francisco: Jossey-Bass; 2005.
- 25  
26 33. Assaf Y, Pasternak O. Diffusion tensor imaging (DTI)-based white matter mapping in  
27  
28 brain research: a review. *J Mol Neurosci* 2008;34:51-61.
- 29  
30 34. Kwak SY, Yeo SS, Choi BY, *et al.* Corticospinal tract change in the unaffected  
31  
32 hemisphere at the early stage of intracerebral hemorrhage: a diffusion tensor  
33  
34 tractography study. *Eur Neurol* 2010;63:149-53.
- 35  
36 35. Folstein MF, Folstein SE, McHugh PR. "Mini-mental state". A practical method for  
37  
38 grading the cognitive state of patients for the clinician. *J Psychiatr Res* 1975;12:189-  
39  
40 98.
- 41  
42 36. Liu Y, Soppi V, Mustonen T, *et al.* Subarachnoid hemorrhage in the subacute stage:  
43  
44 elevated apparent diffusion coefficient in normal-appearing brain tissue after  
45  
46 treatment. *Radiology* 2007;242:518-25.
- 47  
48 37. Jang SH. Somatotopic arrangement and location of the corticospinal tract in the  
49  
50  
51  
52  
53  
54  
55

1  
2  
3  
4 brainstem of the human brain. *Yonsei Med J* 2011;52:553-7.  
5

6 38. Yamada K, Sakai K, Akazawa K, *et al.* MR tractography: a review of its clinical  
7 applications. *Magn Reson Med Sci* 2009;8:165-74.  
8

9  
10 39. Lee SK, Kim DI, Kim J, *et al.* Diffusion-tensor MR imaging and fiber tractography: a  
11 new method of describing aberrant fiber connections in developmental CNS  
12 anomalies. *Radiographics* 2005;25:53-65; discussion 6-8.  
13  
14  
15  
16  
17  
18  
19  
20  
21  
22  
23  
24  
25  
26  
27  
28  
29  
30  
31  
32  
33  
34  
35  
36  
37  
38  
39  
40  
41  
42  
43  
44  
45  
46  
47  
48  
49  
50  
51  
52  
53  
54  
55  
56  
57  
58  
59  
60

**Figure legend**

**Fig 1.** Diffusion tensor tractography (DTT) for the mammillothalamic tract (MTT). Brain CT shows subarachnoid hemorrhage and the MTTs in both hemispheres of a patient (34-year old male) are reconstructed between the mammillary body and the anterior thalamus. However, the right MTT (red) of the patient is thinned, compared with the left MTT (green) of the patients and normal control subjects.



1  
2  
3  
4 **Fig. 2.** The incidence of injury of the mammillothalamic tract  
5  
6

7 (FA: fractional anisotropy, MTT: mammillothalamic tract, TV: tract volume)  
8  
9  
10  
11  
12  
13  
14  
15  
16  
17  
18  
19  
20  
21  
22  
23  
24  
25  
26  
27  
28  
29  
30  
31  
32  
33  
34  
35  
36  
37  
38  
39  
40  
41  
42  
43  
44  
45  
46  
47  
48  
49  
50  
51  
52  
53  
54  
55  
56  
57  
58  
59  
60

For peer review only

**Table 1.** Demographic data for the patient and control groups.

|                                          | Patient group ( <i>n</i> =16) | Control group ( <i>n</i> =15) |
|------------------------------------------|-------------------------------|-------------------------------|
| Age (year)                               | 51.6±13.3                     | 48.1±15.1                     |
| Sex, male/female                         | 9 / 7                         | 7 / 8                         |
| Duration from onset (weeks)              | 5.7 ± 1.5                     |                               |
| Modified Fisher grade                    | 2.5 ± 0.9                     |                               |
| WFNS                                     | 2.1 ± 1.3                     |                               |
| Hijdra score                             | 15.7 ± 6.3                    |                               |
| Ruptured artery<br>(ACoA:ACA:MCA:PCA)    | 11:1:3:1                      |                               |
| Operation type<br>(clipping:coiling:non) | 12:2:2                        |                               |
| MMSE                                     | 19.8±8.8                      |                               |

WFNS: World Federation of Neurosurgical Societies, ACoA: anterior communicating, ACA: anterior cerebral artery, MCA: middle cerebral artery, PCA: posterior communicating artery, MMSE: Mini-mental state examination

**Table 2.** Results of diffusion tensor tractography parameters of the mammillothalamic tract in the patient and control groups.

|               | Hemisphere | FA                | <i>p</i> | Tract volume         | <i>p</i> |
|---------------|------------|-------------------|----------|----------------------|----------|
| Patient group | Right      | 0.36 (0.04, 0.36) |          | 69.08 (30.33, 72.00) |          |
|               | Left       | 0.35 (0.04, 0.36) |          | 78.86 (28.80, 80.50) |          |
|               | Both       | 0.36 (0.04, 0.36) | .015*    | 74.15 (23.39, 74.00) | .000*    |
| Control group | Right      | 0.38 (0.04, 0.38) |          | 96.80 (22.7, 96.00)  |          |
|               | Left       | 0.37 (0.03, 0.38) |          | 99.73 (23.8, 103.00) |          |
|               | Both       | 0.38 (0.03, 0.38) |          | 98.27 (22.9, 98.50)  |          |

Values represent mean ( $\pm$ standard deviation, median value), FA: fractional anisotropy, *p*: An independent t-test for determination of variances in FA and tract volume between the patient and control groups.

\* *p* < .05



32  
33  
34  
35  
36  
37  
38  
39  
40  
41  
42  
43  
44  
45  
46  
47  
48  
49  
50  
51  
52  
53  
54  
55  
56  
57  
58  
59  
60

Fig 1. Diffusion tensor tractography (DTT) for the mammillothalamic tract (MTT). Brain CT shows subarachnoid hemorrhage and the MTTs in both hemispheres of a patient (34-year old male) are reconstructed between the mammillary body and the anterior thalamus. However, the right MTT (red) of the patient is thinned, compared with the left MTT (green) of the patients and normal control subjects.  
148x109mm (300 x 300 DPI)

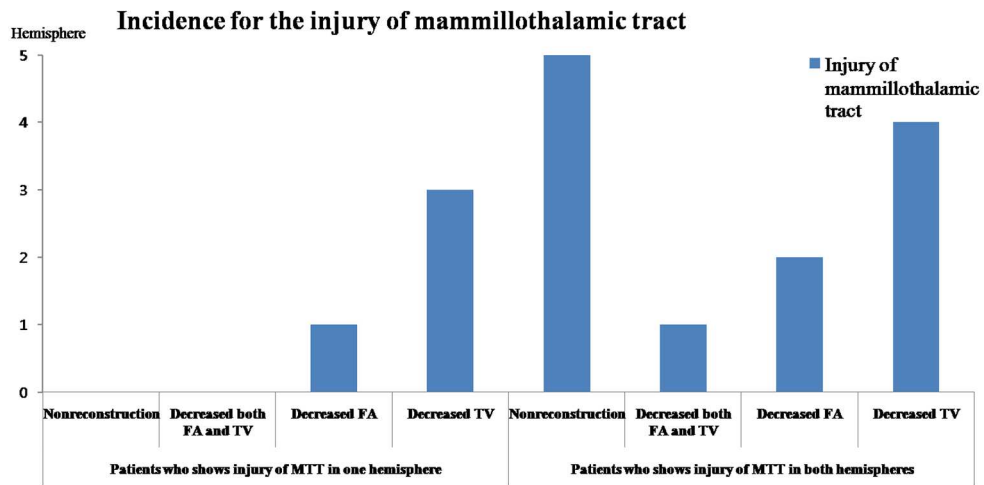

Fig. 2. The incidence of injury of the mammillothalamic tract (FA: fractional anisotropy, MTT: mammillothalamic tract, TV: tract volume)

216x109mm (300 x 300 DPI)

review only

1  
2  
3  
4  
5  
6  
7  
8  
9  
10  
11  
12  
13  
14  
15  
16  
17  
18  
19  
20  
21  
22  
23  
24  
25  
26  
27  
28  
29  
30  
31  
32  
33  
34  
35  
36  
37  
38  
39  
40  
41  
42  
43  
44  
45  
46  
47  
48  
49  
50  
51  
52  
53  
54  
55  
56  
57  
58  
59  
60

1  
2  
3  
4  
5  
6  
7  
8  
9  
10  
11  
12  
13  
14  
15  
16  
17  
18  
19  
20  
21  
22  
23  
24  
25  
26  
27  
28  
29  
30  
31  
32  
33  
34  
35  
36  
37  
38  
39  
40  
41  
42  
43  
44  
45  
46  
47  
48  
49

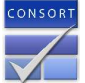

# CONSORT 2010 checklist of information to include when reporting a randomised trial\*

| Section/Topic                    | Item No | Checklist item                                                                                                                                                                              | Reported on page No |
|----------------------------------|---------|---------------------------------------------------------------------------------------------------------------------------------------------------------------------------------------------|---------------------|
| <b>Title and abstract</b>        |         |                                                                                                                                                                                             |                     |
|                                  | 1a      | Identification as a randomised trial in the title                                                                                                                                           |                     |
|                                  | 1b      | Structured summary of trial design, methods, results, and conclusions (for specific guidance see CONSORT for abstracts)                                                                     | 4                   |
| <b>Introduction</b>              |         |                                                                                                                                                                                             |                     |
| Background and objectives        | 2a      | Scientific background and explanation of rationale                                                                                                                                          | 5                   |
|                                  | 2b      | Specific objectives or hypotheses                                                                                                                                                           | 5                   |
| <b>Methods</b>                   |         |                                                                                                                                                                                             |                     |
| Trial design                     | 3a      | Description of trial design (such as parallel, factorial) including allocation ratio                                                                                                        | 6                   |
|                                  | 3b      | Important changes to methods after trial commencement (such as eligibility criteria), with reasons                                                                                          | 6-7                 |
| Participants                     | 4a      | Eligibility criteria for participants                                                                                                                                                       | 6                   |
|                                  | 4b      | Settings and locations where the data were collected                                                                                                                                        |                     |
| Interventions                    | 5       | The interventions for each group with sufficient details to allow replication, including how and when they were actually administered                                                       |                     |
| Outcomes                         | 6a      | Completely defined pre-specified primary and secondary outcome measures, including how and when they were assessed                                                                          | 6-7                 |
|                                  | 6b      | Any changes to trial outcomes after the trial commenced, with reasons                                                                                                                       |                     |
| Sample size                      | 7a      | How sample size was determined                                                                                                                                                              | 6                   |
|                                  | 7b      | When applicable, explanation of any interim analyses and stopping guidelines                                                                                                                |                     |
| <b>Randomisation:</b>            |         |                                                                                                                                                                                             |                     |
| Sequence generation              | 8a      | Method used to generate the random allocation sequence                                                                                                                                      | 6                   |
|                                  | 8b      | Type of randomisation; details of any restriction (such as blocking and block size)                                                                                                         |                     |
| Allocation concealment mechanism | 9       | Mechanism used to implement the random allocation sequence (such as sequentially numbered containers), describing any steps taken to conceal the sequence until interventions were assigned |                     |
| Implementation                   | 10      | Who generated the random allocation sequence, who enrolled participants, and who assigned participants to interventions                                                                     | 6                   |
| Blinding                         | 11a     | If done, who was blinded after assignment to interventions (for example, participants, care providers, those                                                                                |                     |

|    |                          |                                                                                                                     |       |
|----|--------------------------|---------------------------------------------------------------------------------------------------------------------|-------|
| 1  |                          |                                                                                                                     |       |
| 2  |                          | assessing outcomes) and how                                                                                         |       |
| 3  |                          |                                                                                                                     |       |
| 4  |                          | 11b If relevant, description of the similarity of interventions                                                     |       |
| 5  | Statistical methods      | 12a Statistical methods used to compare groups for primary and secondary outcomes                                   | 6     |
| 6  |                          | 12b Methods for additional analyses, such as subgroup analyses and adjusted analyses                                | 6     |
| 7  |                          |                                                                                                                     |       |
| 8  | <b>Results</b>           |                                                                                                                     |       |
| 9  | Participant flow (a      | 13a For each group, the numbers of participants who were randomly assigned, received intended treatment, and        |       |
| 10 | diagram is strongly      | were analysed for the primary outcome                                                                               |       |
| 11 | recommended)             | 13b For each group, losses and exclusions after randomisation, together with reasons                                |       |
| 12 | Recruitment              | 14a Dates defining the periods of recruitment and follow-up                                                         |       |
| 13 |                          | 14b Why the trial ended or was stopped                                                                              |       |
| 14 |                          |                                                                                                                     |       |
| 15 | Baseline data            | 15 A table showing baseline demographic and clinical characteristics for each group                                 |       |
| 16 | Numbers analysed         | 16 For each group, number of participants (denominator) included in each analysis and whether the analysis was      |       |
| 17 |                          | by original assigned groups                                                                                         |       |
| 18 |                          |                                                                                                                     |       |
| 19 | Outcomes and             | 17a For each primary and secondary outcome, results for each group, and the estimated effect size and its           | 9-10  |
| 20 | estimation               | precision (such as 95% confidence interval)                                                                         |       |
| 21 |                          | 17b For binary outcomes, presentation of both absolute and relative effect sizes is recommended                     |       |
| 22 | Ancillary analyses       | 18 Results of any other analyses performed, including subgroup analyses and adjusted analyses, distinguishing       | 9-10  |
| 23 |                          | pre-specified from exploratory                                                                                      |       |
| 24 |                          |                                                                                                                     |       |
| 25 | Harms                    | 19 All important harms or unintended effects in each group (for specific guidance see CONSORT for harms)            |       |
| 26 |                          |                                                                                                                     |       |
| 27 | <b>Discussion</b>        |                                                                                                                     |       |
| 28 | Limitations              | 20 Trial limitations, addressing sources of potential bias, imprecision, and, if relevant, multiplicity of analyses | 12-13 |
| 29 | Generalisability         | 21 Generalisability (external validity, applicability) of the trial findings                                        |       |
| 30 | Interpretation           | 22 Interpretation consistent with results, balancing benefits and harms, and considering other relevant evidence    |       |
| 31 |                          |                                                                                                                     |       |
| 32 | <b>Other information</b> |                                                                                                                     |       |
| 33 | Registration             | 23 Registration number and name of trial registry                                                                   |       |
| 34 | Protocol                 | 24 Where the full trial protocol can be accessed, if available                                                      |       |
| 35 | Funding                  | 25 Sources of funding and other support (such as supply of drugs), role of funders                                  | 13    |
| 36 |                          |                                                                                                                     |       |

37

38 \*We strongly recommend reading this statement in conjunction with the CONSORT 2010 Explanation and Elaboration for important clarifications on all the items. If relevant, we also

39 recommend reading CONSORT extensions for cluster randomised trials, non-inferiority and equivalence trials, non-pharmacological treatments, herbal interventions, and pragmatic trials.

40 Additional extensions are forthcoming: for those and for up to date references relevant to this checklist, see [www.consort-statement.org](http://www.consort-statement.org).

41

42
